# Supplementary material for: Phenylpropionamides, Piperidine, and Phenolic Derivatives from the Fruit of Ailanthus altissima
Source: MDPI journal article supplement (doi:10.3390/molecules22122107), 2017-12-04
Supplement: s1 [file s1]

## Supplementary Materials

**Title:** Phenylpropionamides, Piperidine and Phenolic Derivatives from the Fruit of *Ailanthus altissima*

**Authors:** Jian-Cheng Ni, Jian-Ting Shi, Qing-Wei Tan\*, and Qi-Jian Chen\*

- S1. IR spectra of 2-hydroxy-*N*-[(2-*O*- $\beta$ -D-glucopyranosyl)phenyl]propionamide (1).
- S2. HRESIMS spectra of 2-hydroxy-*N*-[(2-*O*- $\beta$ -D-glucopyranosyl)phenyl]propionamide (1).
- S3. <sup>1</sup>H-NMR spectra of 2-hydroxy-*N*-[(2-*O*- $\beta$ -D-glucopyranosyl)phenyl]propionamide (1) (500 MHz, DMSO-*d*<sub>6</sub>).
- S4. <sup>13</sup>C NMR spectra of 2-hydroxy-*N*-[(2-*O*- $\beta$ -D-glucopyranosyl)phenyl]propionamide (1) (125 MHz, DMSO-*d*<sub>6</sub>).
- S5. DEPT of 2-hydroxy-*N*-[(2-*O*- $\beta$ -D-glucopyranosyl)phenyl]propionamide (1).
- S6. <sup>1</sup>H-<sup>1</sup>H COSY of 2-hydroxy-*N*-[(2-*O*- $\beta$ -D-glucopyranosyl)phenyl]propionamide (1).
- S7. HSQC of 2-hydroxy-*N*-[(2-*O*- $\beta$ -D-glucopyranosyl)phenyl]propionamide (1).
- S8. HMBC of 2-hydroxy-*N*-[(2-*O*- $\beta$ -D-glucopyranosyl)phenyl]propionamide (1).
- S9. NOESY of 2-hydroxy-*N*-[(2-*O*- $\beta$ -D-glucopyranosyl)phenyl]propionamide (1).
- S10. IR spectra of 2-hydroxy-*N*-[(2-*O*- $\beta$ -D-glucopyranosyl-(1 $\rightarrow$ 6)- $\beta$ -D-glucopyranosyl)phenyl]propionamide (2).
- S11. HRESIMS of 2-hydroxy-*N*-[(2-*O*- $\beta$ -D-glucopyranosyl-(1 $\rightarrow$ 6)- $\beta$ -D-glucopyranosyl)phenyl]propionamide (2).
- S12. <sup>1</sup>H-NMR spectra of 2-hydroxy-*N*-[(2-*O*- $\beta$ -D-glucopyranosyl-(1 $\rightarrow$ 6)- $\beta$ -D-glucopyranosyl)phenyl]propionamide (2) (500 MHz, DMSO-*d*<sub>6</sub>).
- S13. <sup>13</sup>C-NMR spectra of 2-hydroxy-*N*-[(2-*O*- $\beta$ -D-glucopyranosyl-(1 $\rightarrow$ 6)- $\beta$ -D-glucopyranosyl)phenyl]propionamide (2) (125 MHz, DMSO-*d*<sub>6</sub>).
- S14. DEPT of 2-hydroxy-*N*-[(2-*O*- $\beta$ -D-glucopyranosyl-(1 $\rightarrow$ 6)- $\beta$ -D-glucopyranosyl)phenyl]propionamide (2).
- S15. <sup>1</sup>H-<sup>1</sup>H COSY of 2-hydroxy-*N*-[(2-*O*- $\beta$ -D-glucopyranosyl-(1 $\rightarrow$ 6)- $\beta$ -D-glucopyranosyl)phenyl]propionamide (2).
- S16. HSQC of 2-hydroxy-*N*-[(2-*O*- $\beta$ -D-glucopyranosyl-(1 $\rightarrow$ 6)- $\beta$ -D-glucopyranosyl)phenyl]propionamide (2).
- S17. HMBC of 2-hydroxy-*N*-[(2-*O*- $\beta$ -D-glucopyranosyl-(1 $\rightarrow$ 6)- $\beta$ -D-glucopyranosyl)phenyl]propionamide (2).
- S18. NOESY of 2-hydroxy-*N*-[(2-*O*- $\beta$ -D-glucopyranosyl-(1 $\rightarrow$ 6)- $\beta$ -D-glucopyranosyl)phenyl]propionamide (2).
- S19. HRESIMS of 2-hydroxy-*N*-(2-hydroxyphenyl)propionamide (3).
- S20. <sup>1</sup>H-NMR spectra of 2-hydroxy-*N*-(2-hydroxyphenyl)propionamide (3) (500 MHz, DMSO-*d*<sub>6</sub>).
- S21. <sup>13</sup>C-NMR spectra of 2-hydroxy-*N*-(2-hydroxyphenyl)propionamide (3) (125 MHz, DMSO-*d*<sub>6</sub>).
- S22. IR spectra of 2 $\beta$ -carboxyl-piperidine-4 $\beta$ -acetic acid methyl ester (4).
- S23. HRESIMS of 2 $\beta$ -carboxyl-piperidine-4 $\beta$ -acetic acid methyl ester (4).

- S24. <sup>1</sup>H-NMR spectra of 2β-carboxyl-piperidine-4β-acetic acid methyl ester (4) (500 MHz, CD<sub>3</sub>OD).
- S25. <sup>13</sup>C-NMR spectra of 2β-carboxyl-piperidine-4β-acetic acid methyl ester (4) (125 MHz, CD<sub>3</sub>OD).
- S26. DEPT of 2β-carboxyl-piperidine-4β-acetic acid methyl ester (4).
- S27. <sup>1</sup>H-<sup>1</sup>H COSY of 2β-carboxyl-piperidine-4β-acetic acid methyl ester (4).
- S28. HSQC of 2β-carboxyl-piperidine-4β-acetic acid methyl ester (4).
- S29. HMBC of 2β-carboxyl-piperidine-4β-acetic acid methyl ester (4).
- S30. NOESY of 2β-carboxyl-piperidine-4β-acetic acid methyl ester (4).
- S31. IR spectra of 4-hydroxyphenyl-1-O-[6-(hydrogen 3-hydroxy-3-methylpentanedioate)]-β-D-glucopyranoside (5).
- S32. HRESIMS of 4-hydroxyphenyl-1-O-[6-(hydrogen 3-hydroxy-3-methylpentanedioate)]-β-D-glucopyranoside (5).
- S33. <sup>1</sup>H-NMR spectra of 4-hydroxyphenyl-1-O-[6-(hydrogen 3-hydroxy-3-methylpentanedioate)]-β-D-glucopyranoside (5) (500 MHz, DMSO-*d*<sub>6</sub>).
- S34. <sup>13</sup>C NMR spectra of 4-hydroxyphenyl-1-O-[6-(hydrogen 3-hydroxy-3-methylpentanedioate)]-β-D-glucopyranoside (5) (125 MHz, DMSO-*d*<sub>6</sub>).
- S35. DEPT of 4-hydroxyphenyl-1-O-[6-(hydrogen 3-hydroxy-3-methylpentanedioate)]-β-D-glucopyranoside (5).
- S36. <sup>1</sup>H-<sup>1</sup>H COSY of 4-hydroxyphenyl-1-O-[6-(hydrogen 3-hydroxy-3-methylpentanedioate)]-β-D-glucopyranoside (5).
- S37. HSQC of 4-hydroxyphenyl-1-O-[6-(hydrogen 3-hydroxy-3-methylpentanedioate)]-β-D-glucopyranoside (5).
- S38. HMBC of 4-hydroxyphenyl-1-O-[6-(hydrogen 3-hydroxy-3-methylpentanedioate)]-β-D-glucopyranoside (5).
- S39. NOESY of 4-hydroxyphenyl-1-O-[6-(hydrogen 3-hydroxy-3-methylpentanedioate)]-β-D-glucopyranoside (5).
- S40. <sup>1</sup>H- and <sup>13</sup>C-NMR data of compounds 6–10 (δ in ppm, *J* in Hz).
- S41. <sup>1</sup>H- and <sup>13</sup>C-NMR data of compounds 11–16 (δ in ppm, *J* in Hz).
- S42. <sup>1</sup>H- and <sup>13</sup>C-NMR data of compounds 17 and 18 (δ in ppm, *J* in Hz).
- S43. <sup>1</sup>H- and <sup>13</sup>C-NMR data of compounds 19, 20, and 27 (δ in ppm, *J* in Hz).
- S44. <sup>1</sup>H- and <sup>13</sup>C-NMR data of compounds 21 and 28 (δ in ppm, *J* in Hz).
- S45. <sup>1</sup>H- and <sup>13</sup>C-NMR data of compounds 22–26 (δ in ppm, *J* in Hz).

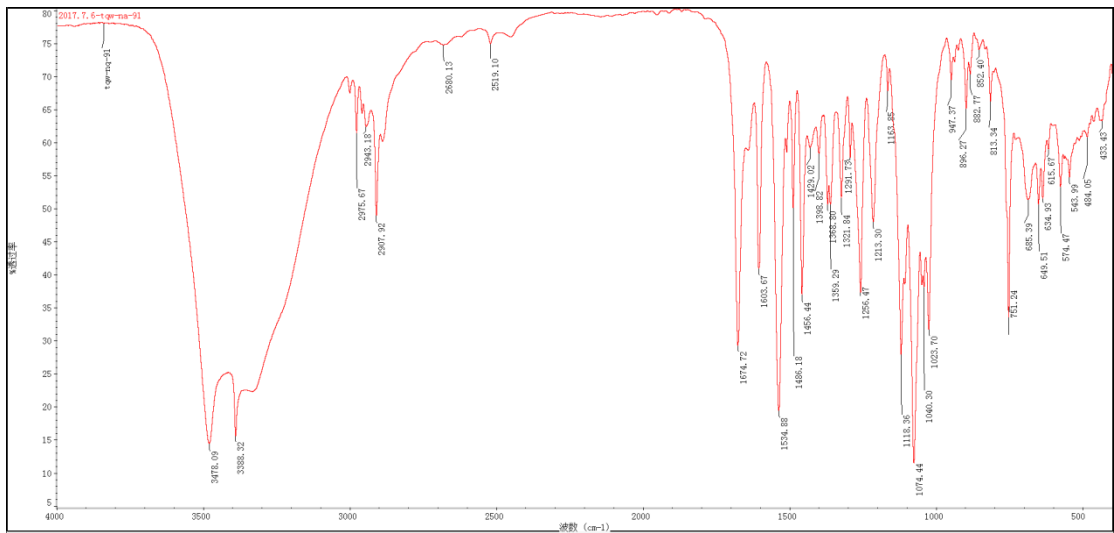

S1. IR spectra of 2-hydroxy-N-[(2-O-β-D-glucopyranosyl)phenyl]propionamide (1)

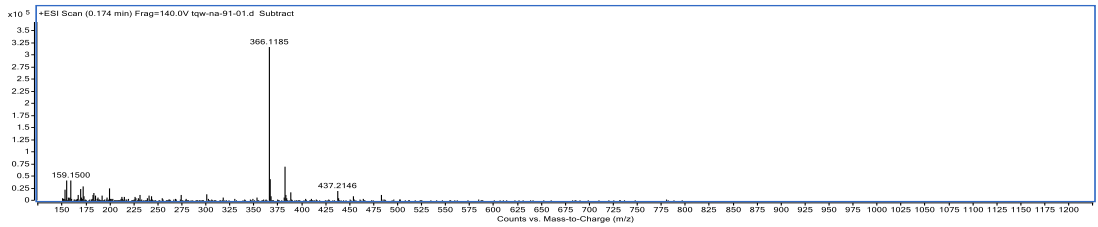

S2. HRESIMS spectra of 2-hydroxy-N-[(2-O-β-D-glucopyranosyl)phenyl]propionamide (1)

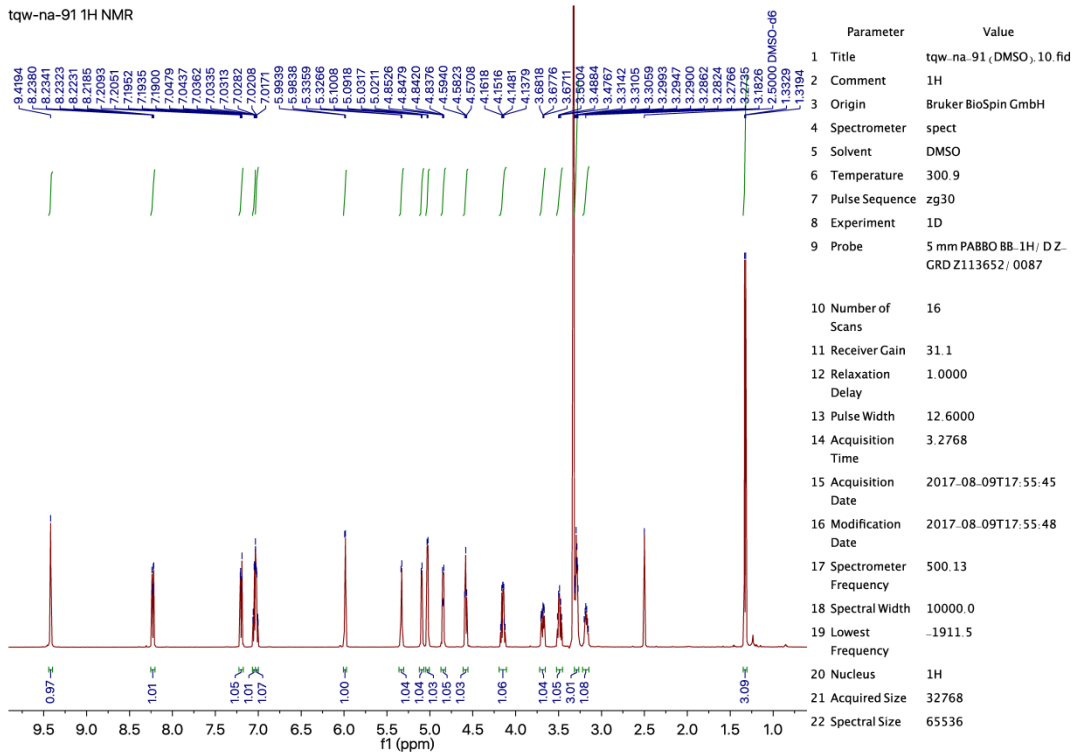

S3. <sup>1</sup>H-NMR spectra of 2-hydroxy-N-[(2-O-β-D-glucopyranosyl)phenyl]propionamide (1) (500 MHz, DMSO-*d*<sub>6</sub>)

tw-n-91 13C NMR

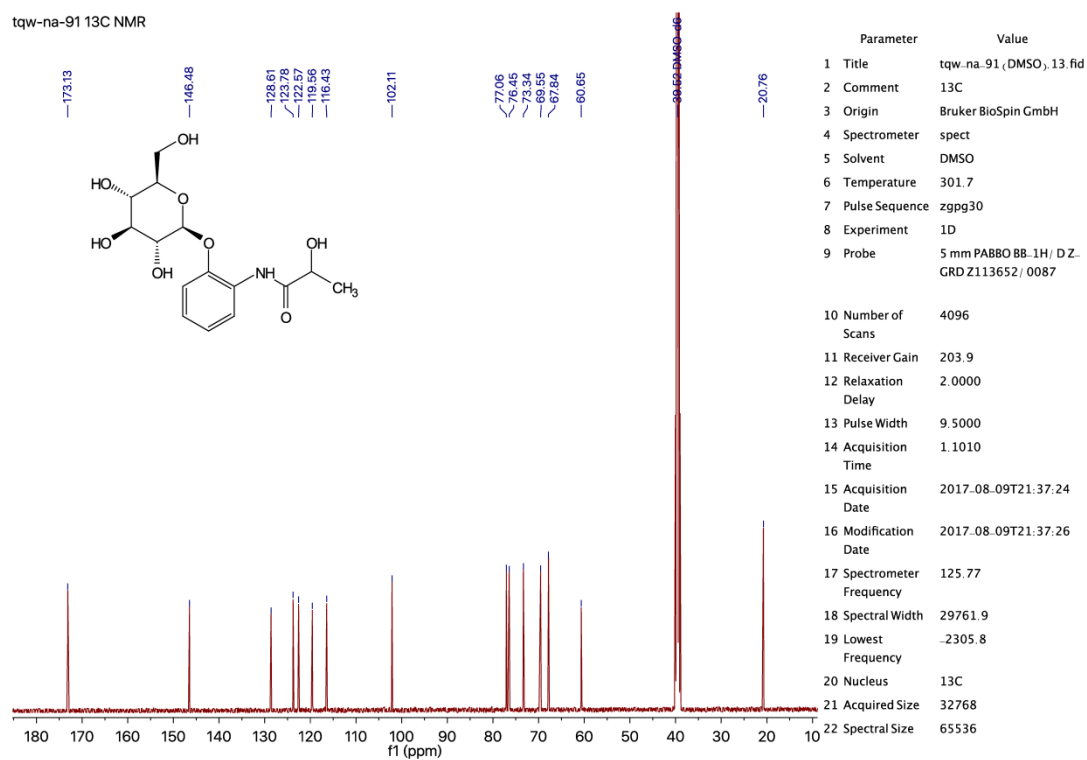

#### S4. <sup>13</sup>C NMR spectra of 2-hydroxy-N-[(2-O-β-D-glucopyranosyl)phenyl]propionamide (1) (125 MHz, DMSO-d<sub>6</sub>)

tw-n-91 DEPT

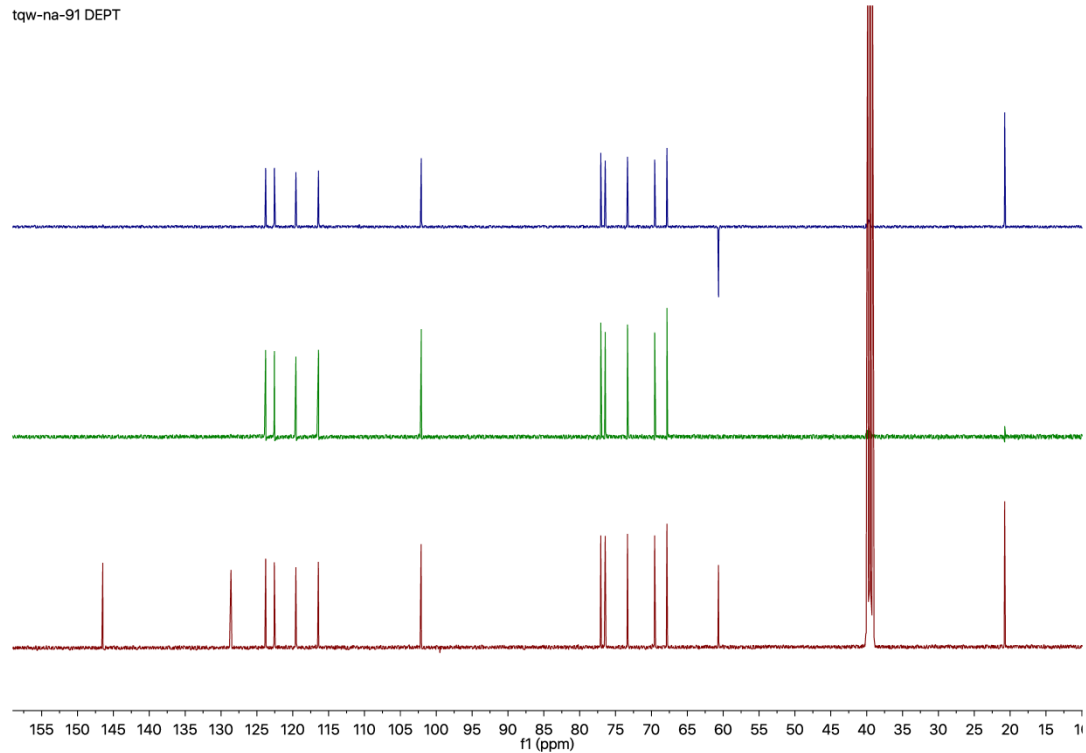

#### S5. DEPT of 2-hydroxy-N-[(2-O-β-D-glucopyranosyl)phenyl]propionamide (1)

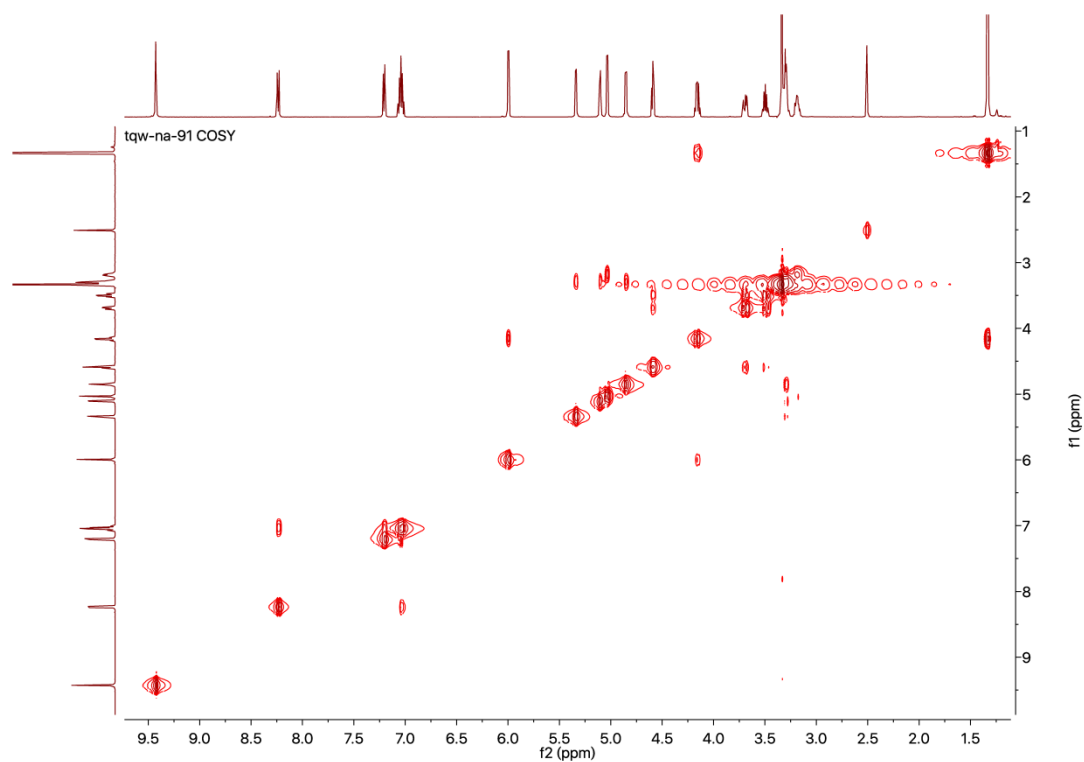

S6.  $^1\text{H}$ - $^1\text{H}$  COSY of 2-hydroxy-*N*-[(2-*O*- $\beta$ -D-glucopyranosyl)phenyl]propionamide (1)

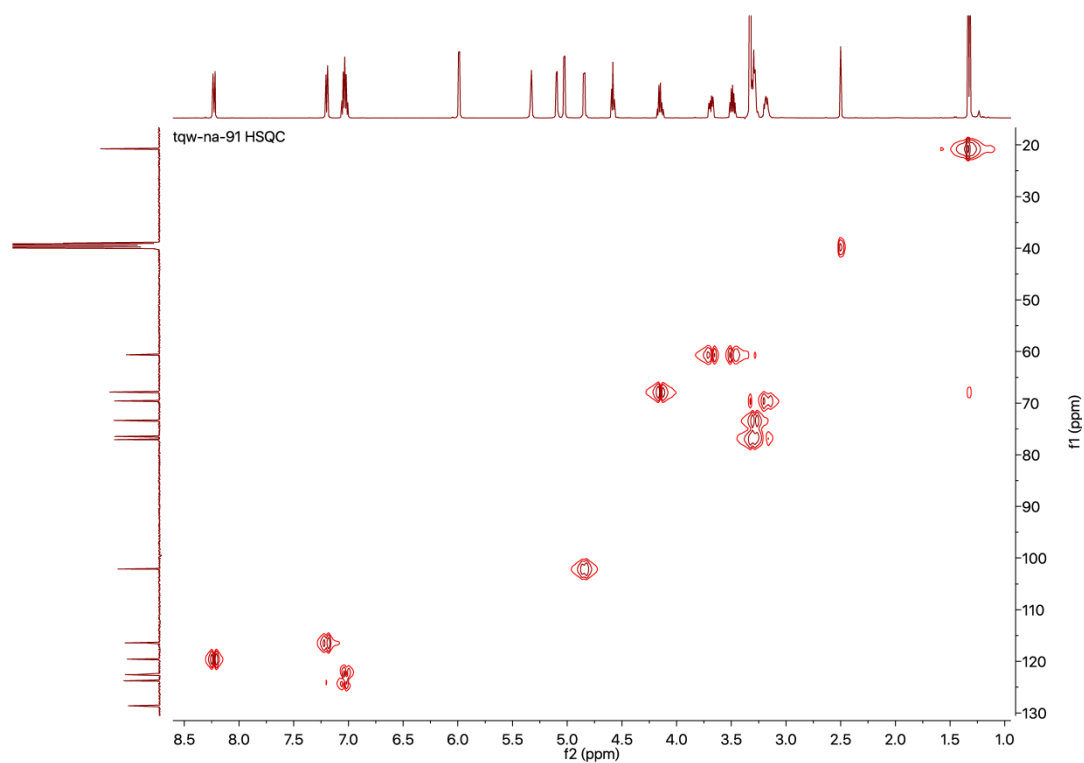

S7. HSQC of 2-hydroxy-*N*-[(2-*O*- $\beta$ -D-glucopyranosyl)phenyl]propionamide (1)

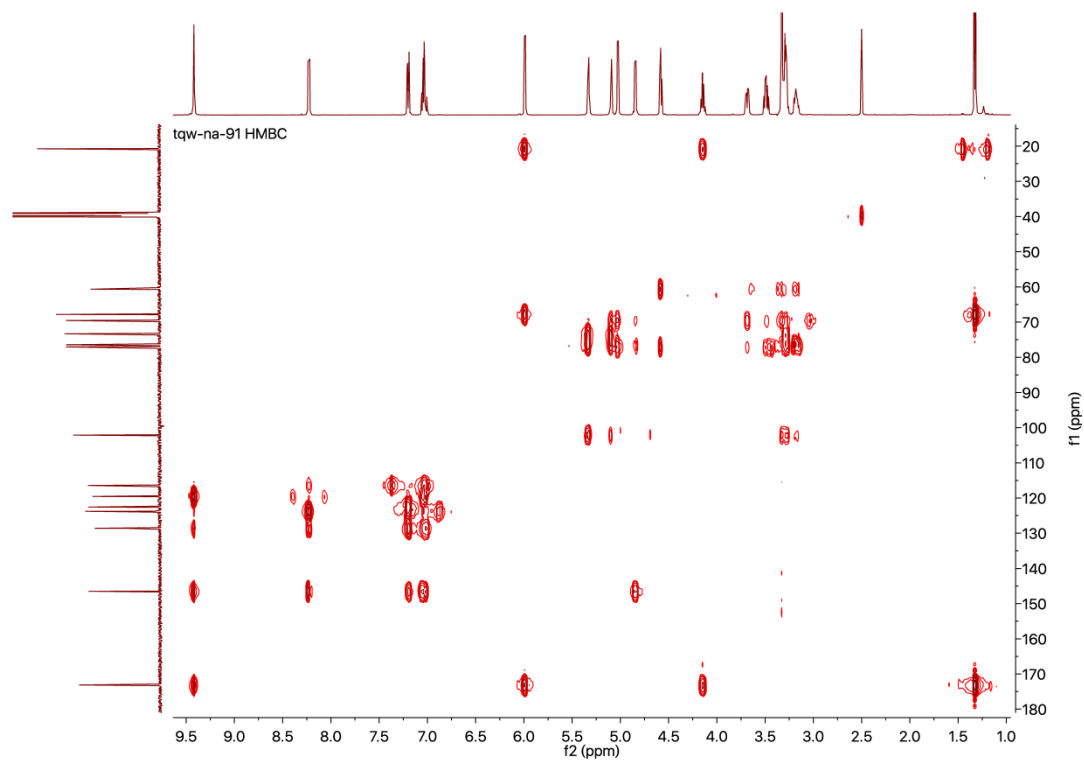

S8. HMBC of 2-hydroxy-*N*-[(2-*O*- $\beta$ -D-glucopyranosyl)phenyl]propionamide (1)

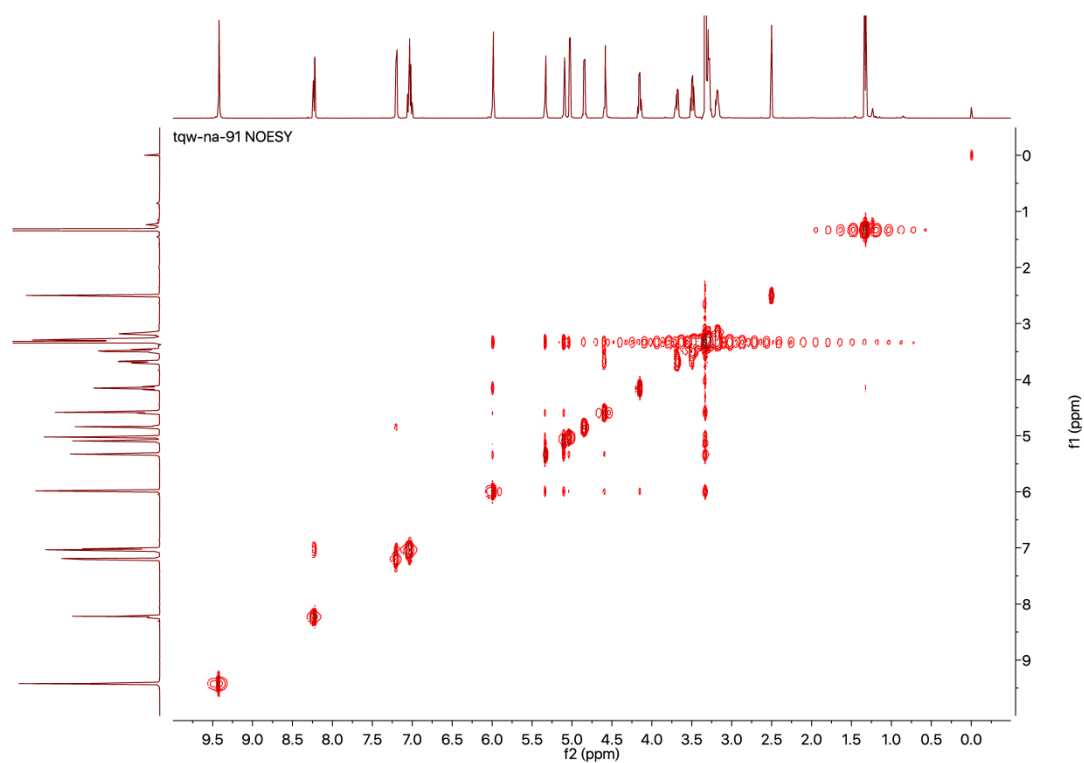

S9. NOESY of 2-hydroxy-*N*-[(2-*O*- $\beta$ -D-glucopyranosyl)phenyl]propionamide (1)

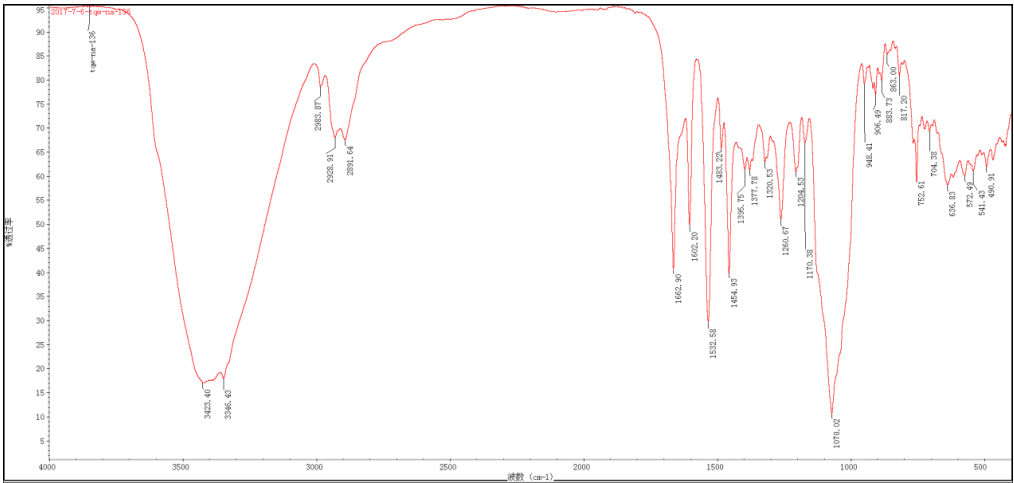

S10. IR spectra of 2-hydroxy-N-[(2-O-β-D-glucopyranosyl-(1 → 6)-β-D-glucopyranosyl)phenyl]propionamide (2)

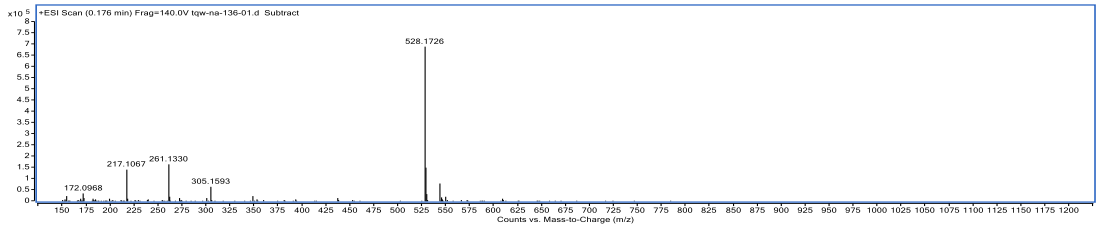

S11. HRESIMS of 2-hydroxy-N-[(2-O-β-D-glucopyranosyl-(1→6)-β-D-glucopyranosyl)phenyl]propionamide (2)

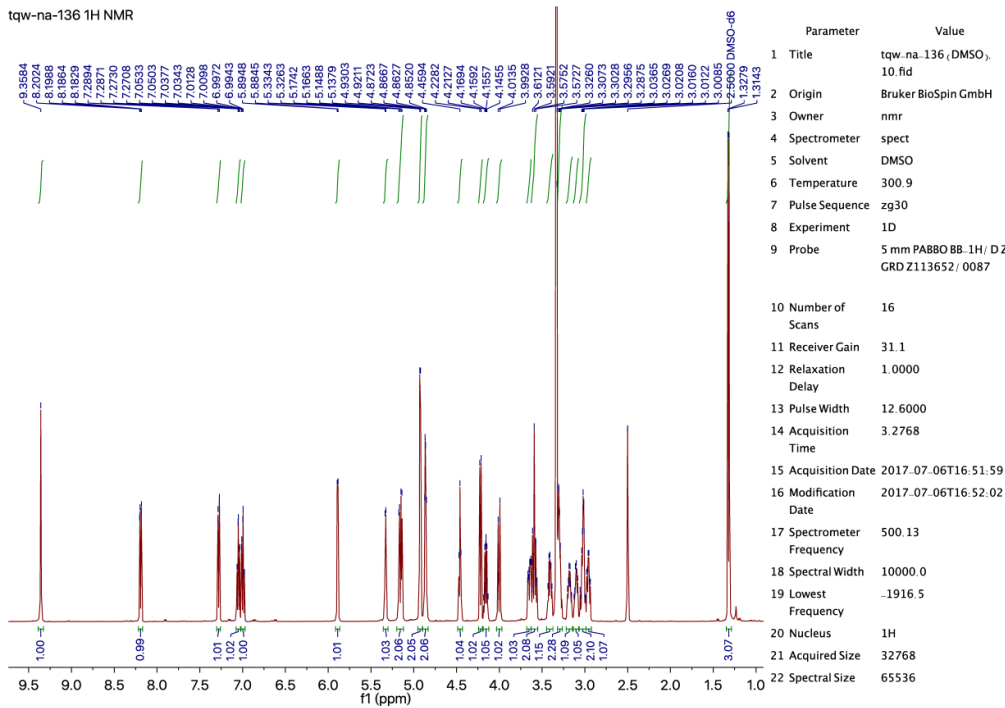

S12. <sup>1</sup>H-NMR spectra of 2-hydroxy-N-[(2-O-β-D-glucopyranosyl-(1→6)-β-D-glucopyranosyl)phenyl]propionamide (2) (500 MHz, DMSO-*d*<sub>6</sub>)

tw-n-136 13C NMR

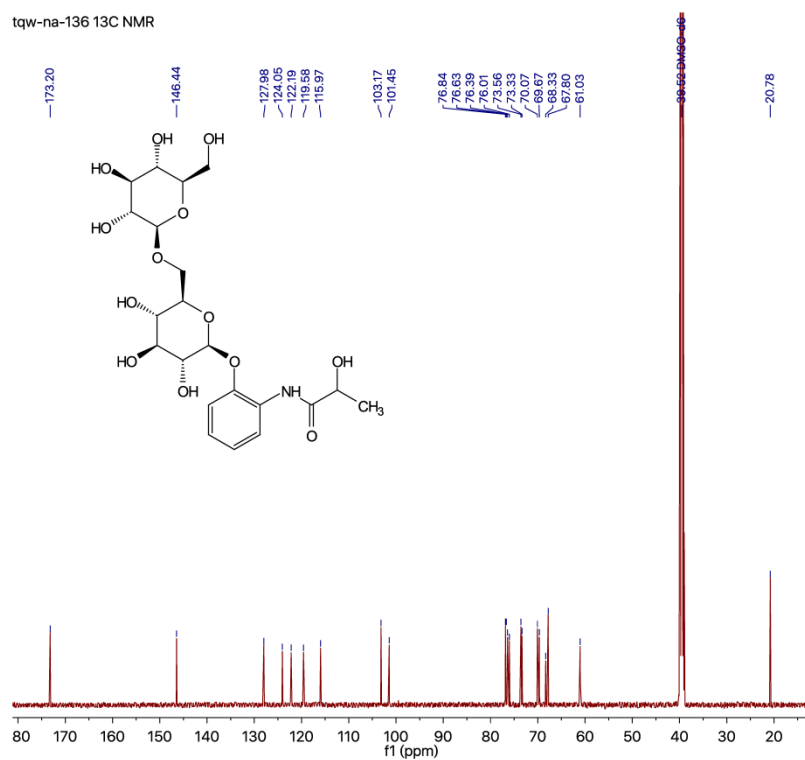

| Parameter                 | Value                                   |
|---------------------------|-----------------------------------------|
| 1 Title                   | tw-n-136 (DMSO), 13.fid                 |
| 2 Origin                  | Bruker BioSpin GmbH                     |
| 3 Owner                   | nmr                                     |
| 4 Spectrometer            | spect                                   |
| 5 Solvent                 | DMSO                                    |
| 6 Temperature             | 301.8                                   |
| 7 Pulse Sequence          | zgpg30                                  |
| 8 Experiment              | 1D                                      |
| 9 Probe                   | 5 mm PABBO BB-1H/ D Z-GRD Z113652/ 0087 |
| 10 Number of Scans        | 4096                                    |
| 11 Receiver Gain          | 203.9                                   |
| 12 Relaxation Delay       | 2.0000                                  |
| 13 Pulse Width            | 9.5000                                  |
| 14 Acquisition Time       | 1.1010                                  |
| 15 Acquisition Date       | 2017-07-06T20:33:54                     |
| 16 Modification Date      | 2017-07-06T20:33:56                     |
| 17 Spectrometer Frequency | 125.77                                  |
| 18 Spectral Width         | 29761.9                                 |
| 19 Lowest Frequency       | -2305.8                                 |
| 20 Nucleus                | 13C                                     |
| 21 Acquired Size          | 32768                                   |
| 22 Spectral Size          | 65536                                   |

### S13. <sup>13</sup>C-NMR spectra of 2-hydroxy-N-[(2-O-β-D-glucopyranosyl-(1→6)-β-D-glucopyranosyl) phenyl]propionamide (2) (125 MHz, DMSO-*d*<sub>6</sub>)

tw-n-136 DEPT

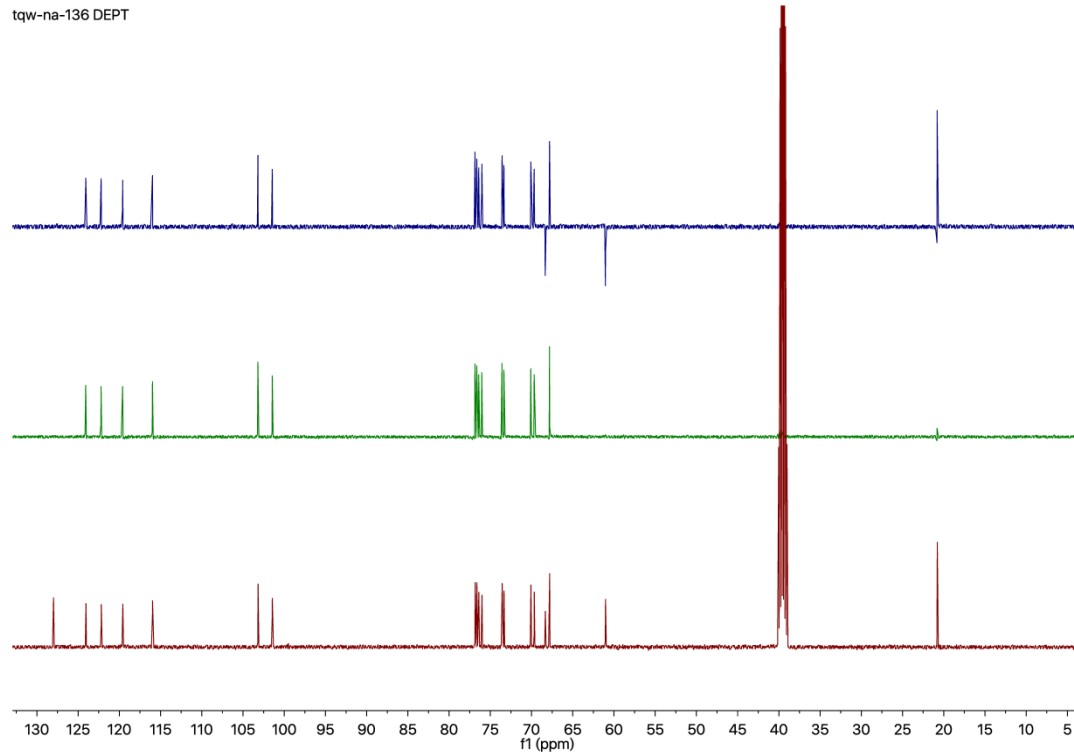

### S14. DEPT of 2-hydroxy-N-[(2-O-β-D-glucopyranosyl-(1 → 6)-β-D-glucopyranosyl) phenyl]propionamide (2)



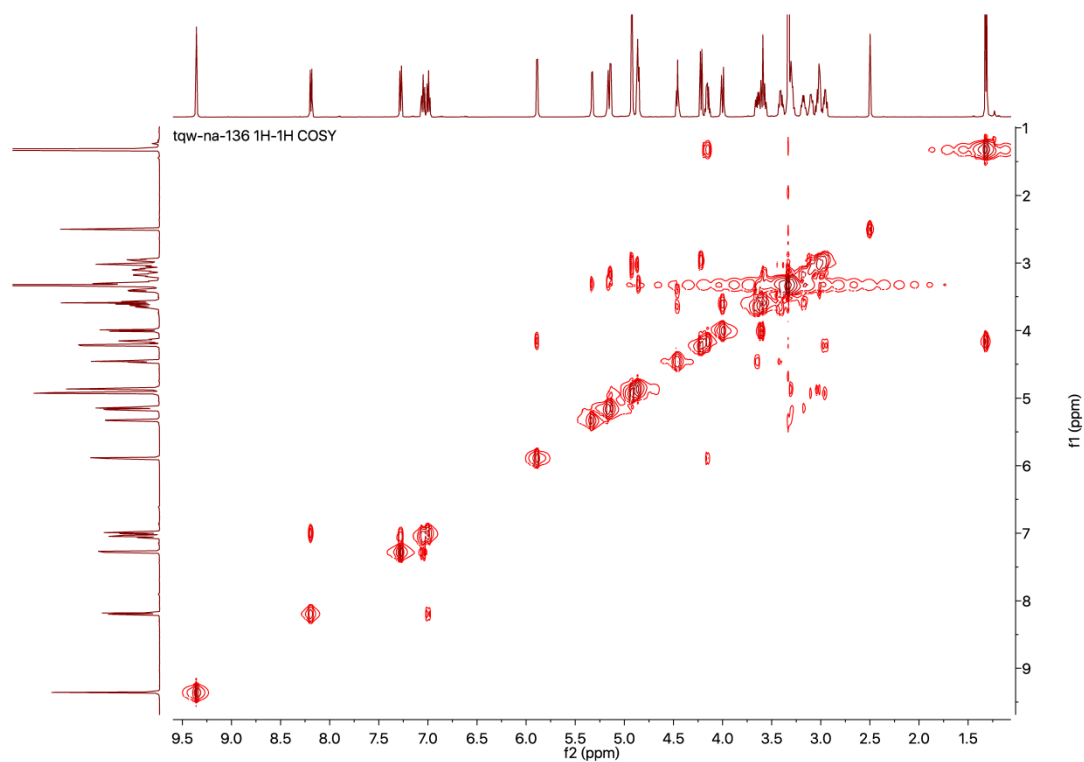

S15.  $^1\text{H}$ - $^1\text{H}$  COSY of 2-hydroxy-*N*-[(2-*O*- $\beta$ -D-glucopyranosyl(1  $\rightarrow$  6)- $\beta$ -D-glucopyranosyl)phenyl]propionamide (2)

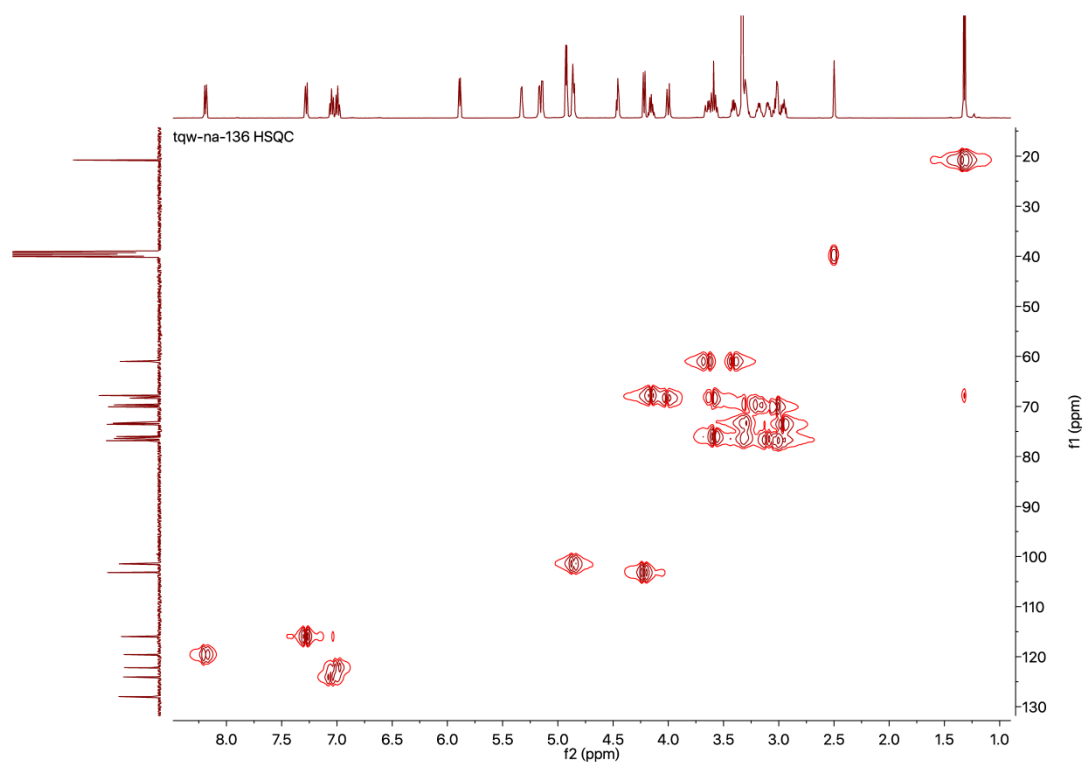

S16. HSQC of 2-hydroxy-*N*-[(2-*O*- $\beta$ -D-glucopyranosyl(1  $\rightarrow$  6)- $\beta$ -D-glucopyranosyl)phenyl]propionamide (2)

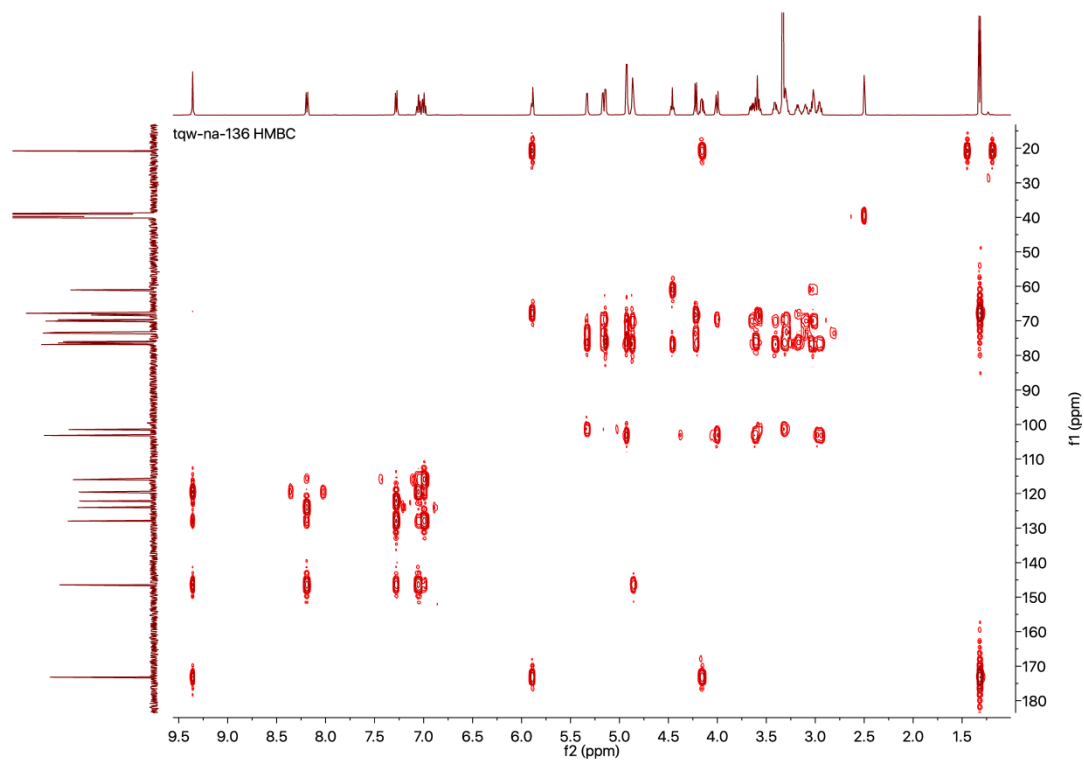

S17. HMBC of 2-hydroxy-*N*-[(2-*O*-β-D-glucopyranosyl(1 → 6)-β-D-glucopyranosyl)phenyl]propionamide (2)

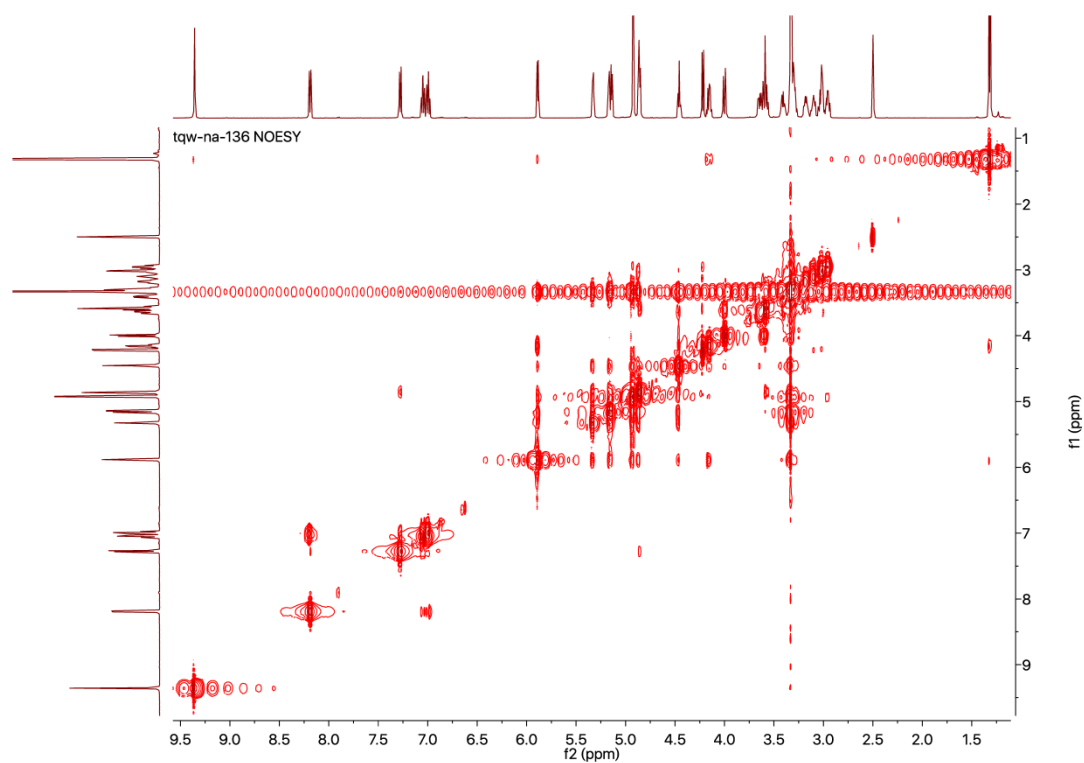

S18. NOESY of 2-hydroxy-*N*-[(2-*O*-β-D-glucopyranosyl(1 → 6)-β-D-glucopyranosyl)phenyl]propionamide (2)

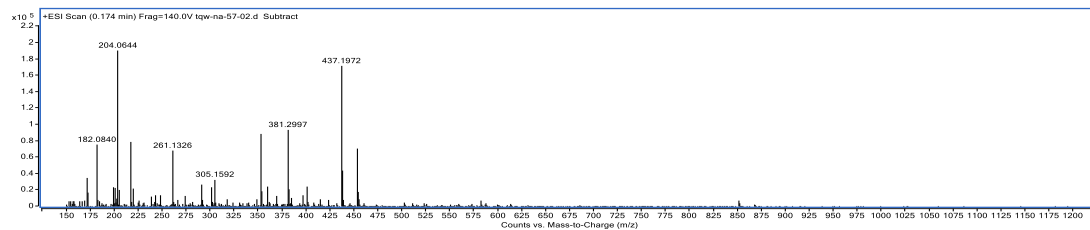

## S19. HRESIMS of 2-hydroxy-N-(2-hydroxyphenyl)propionamide (3)

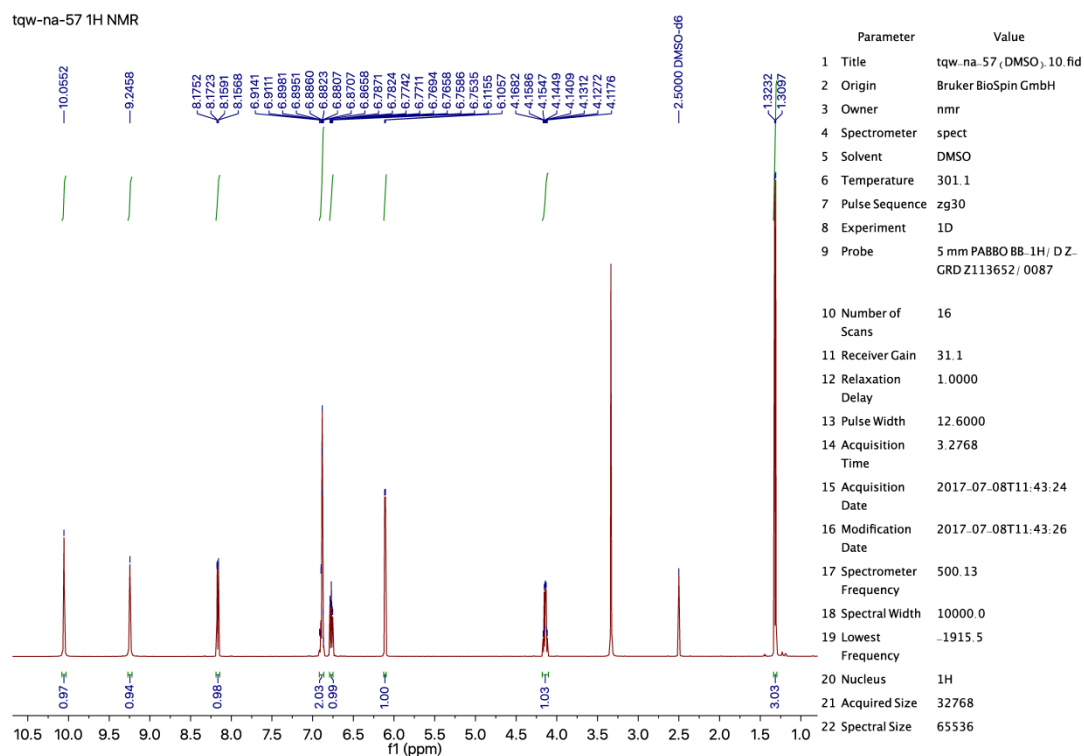

## S20. <sup>1</sup>H-NMR spectra of 2-hydroxy-N-(2-hydroxyphenyl)propionamide (3) (500 MHz, DMSO-d<sub>6</sub>)

13C-NMR spectra of 2-hydroxy-N-(2-hydroxyphenyl)propionamide (3) (125 MHz, DMSO-*d*<sub>6</sub>)

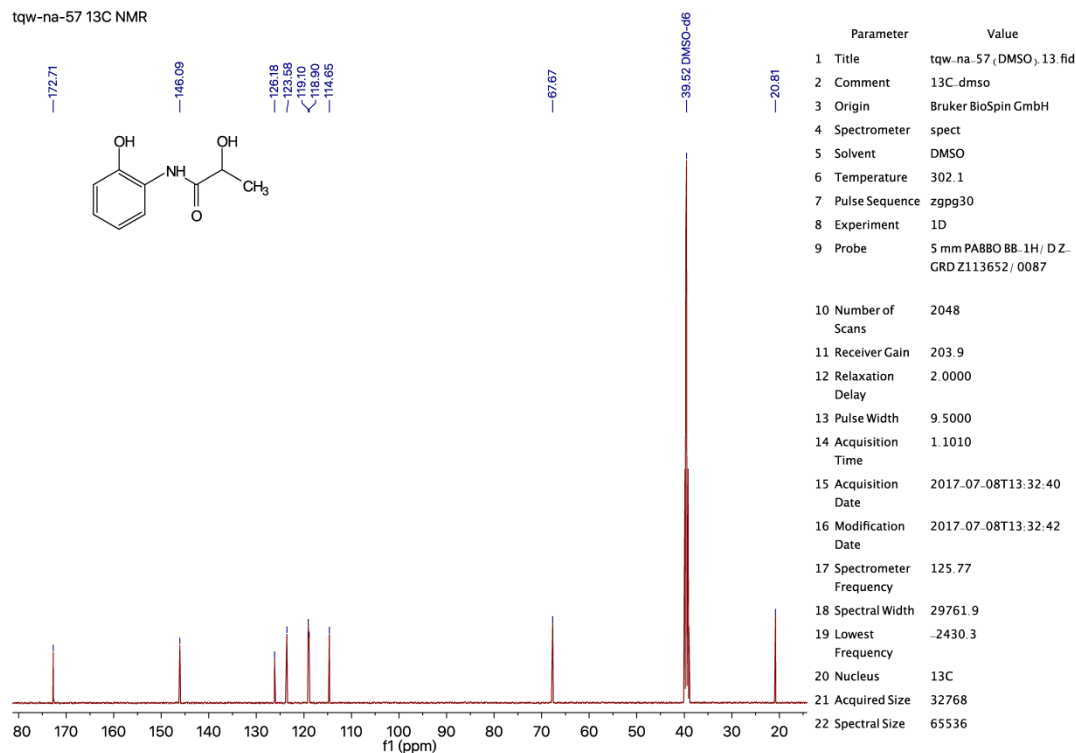

S21. <sup>13</sup>C-NMR spectra of 2-hydroxy-N-(2-hydroxyphenyl)propionamide (3) (125 MHz, DMSO-*d*<sub>6</sub>)

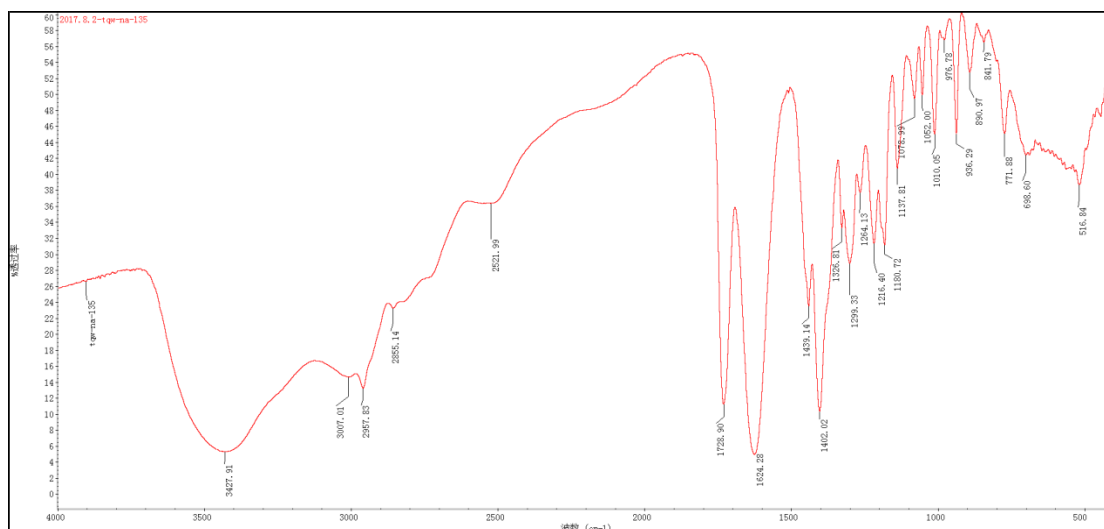

S22. IR spectra of 2β-carboxyl-piperidine-4β-acetic acid methyl ester (4)

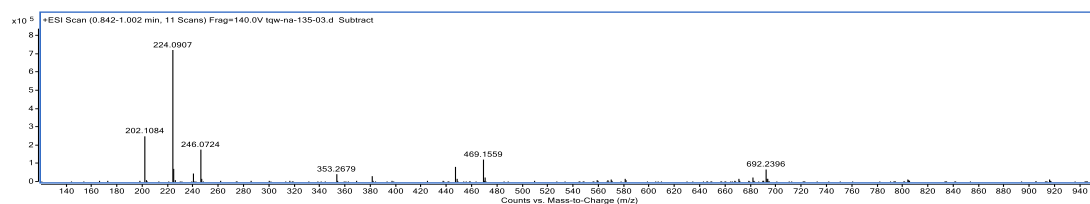

S23. HRESIMS of 2β-carboxyl-piperidine-4β-acetic acid methyl ester (4)

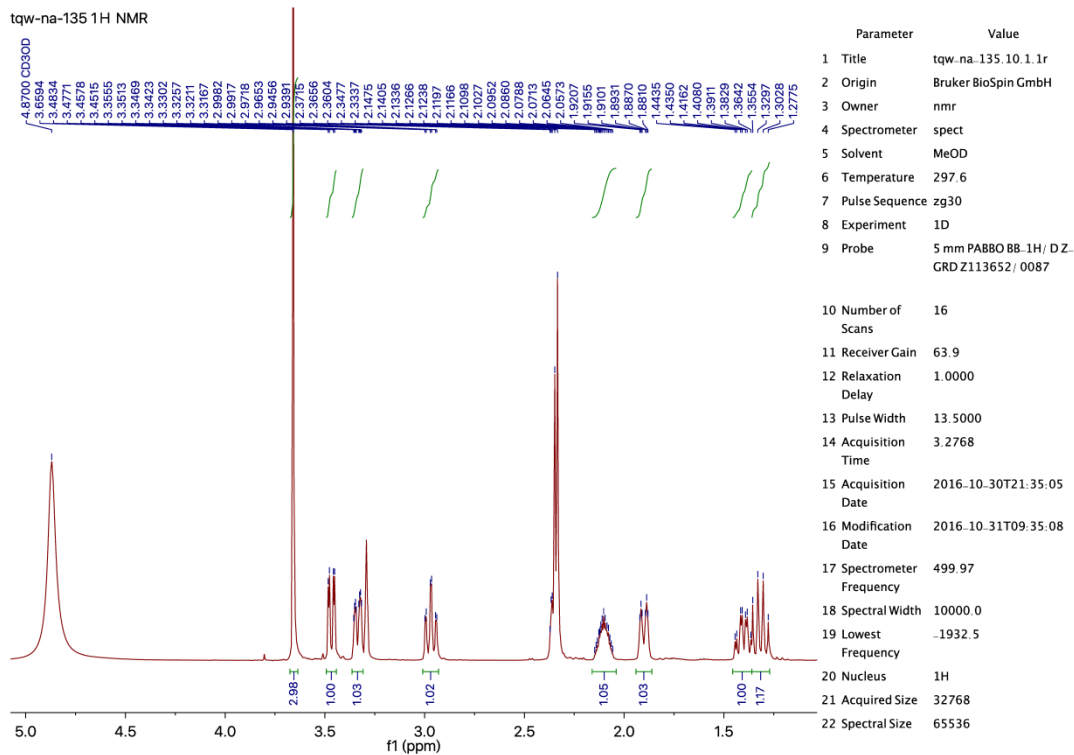

S24. <sup>1</sup>H-NMR spectra of 2β-carboxyl-piperidine-4β-acetic acid methyl ester (4) (500 MHz, CD<sub>3</sub>OD)

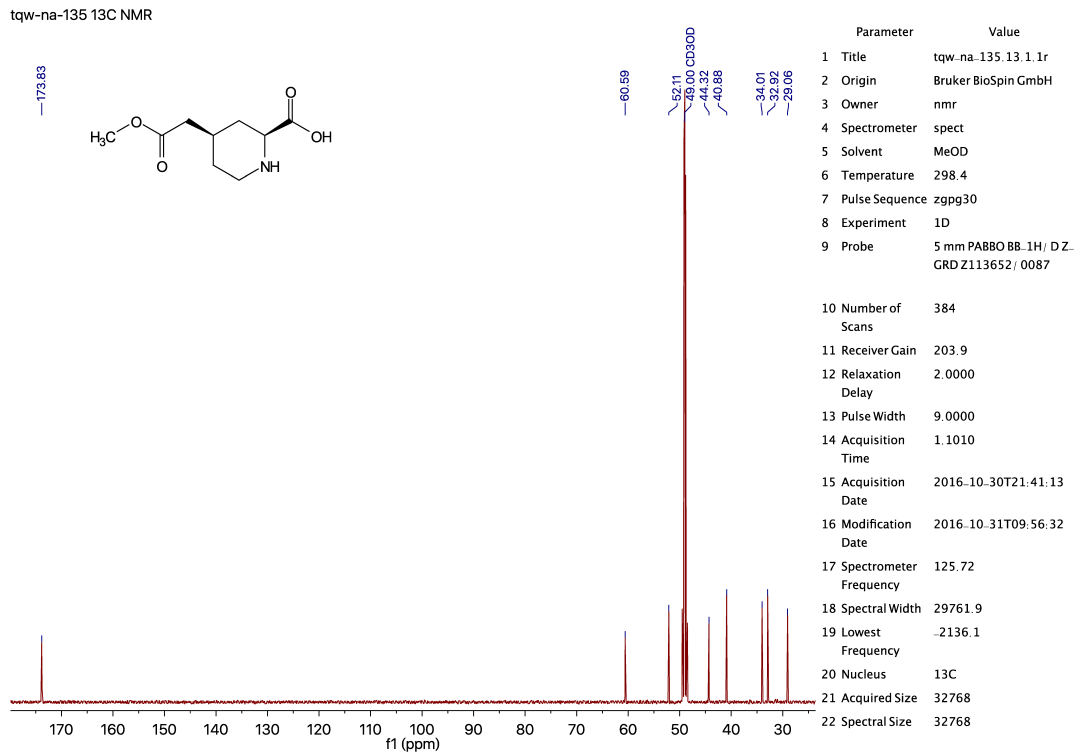

S25. <sup>13</sup>C-NMR spectra of 2β-carboxyl-piperidine-4β-acetic acid methyl ester (4) (125 MHz, CD<sub>3</sub>OD)

tqw-na-135 DEPT135

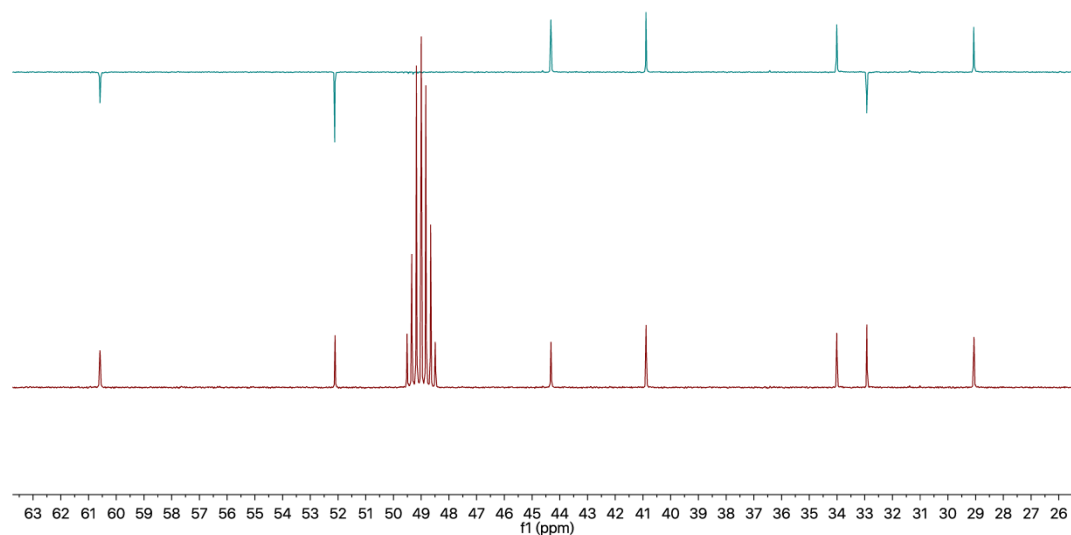

S26. DEPT of 2 $\beta$ -carboxyl-piperidine-4 $\beta$ -acetic acid methyl ester (4)

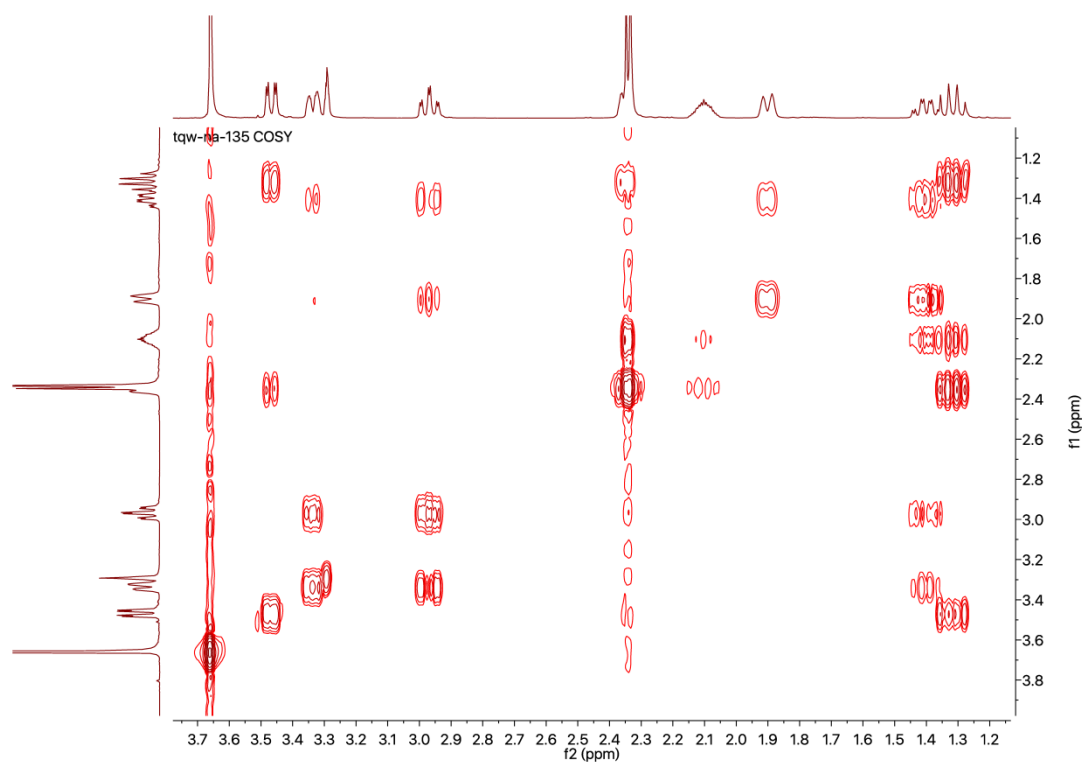

S27. <sup>1</sup>H-<sup>1</sup>H COSY of 2 $\beta$ -carboxyl-piperidine-4 $\beta$ -acetic acid methyl ester (4)

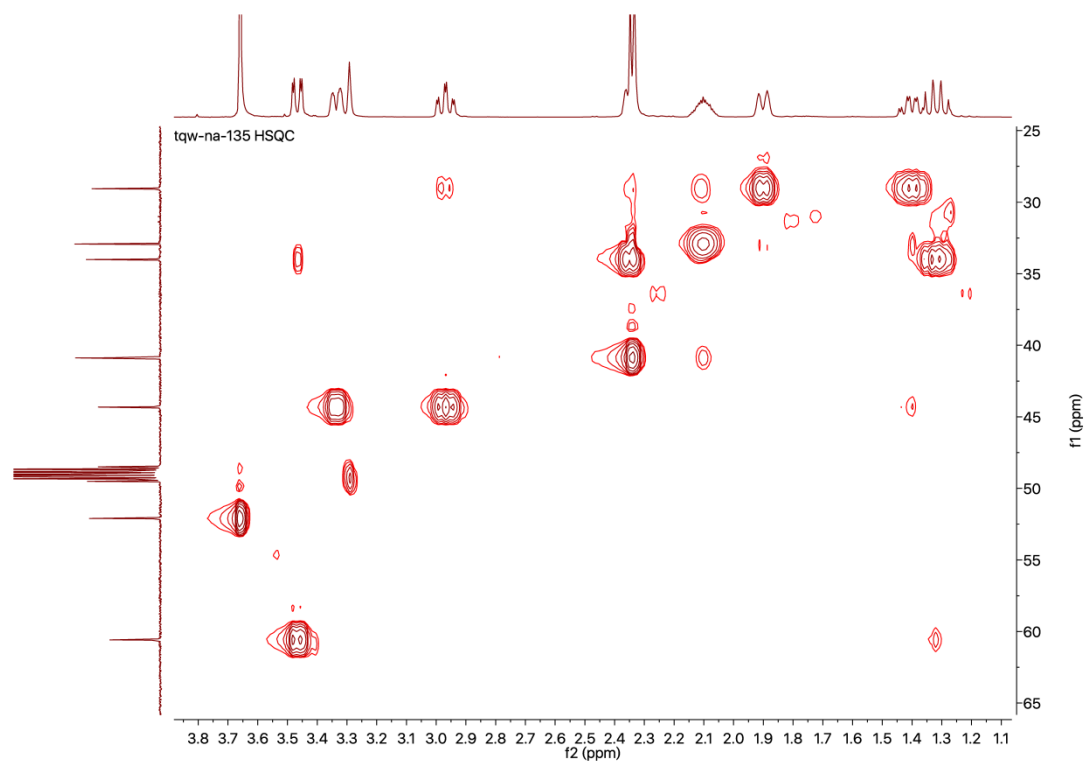

S28. HSQC of 2β-carboxyl-piperidine-4β-acetic acid methyl ester (4)

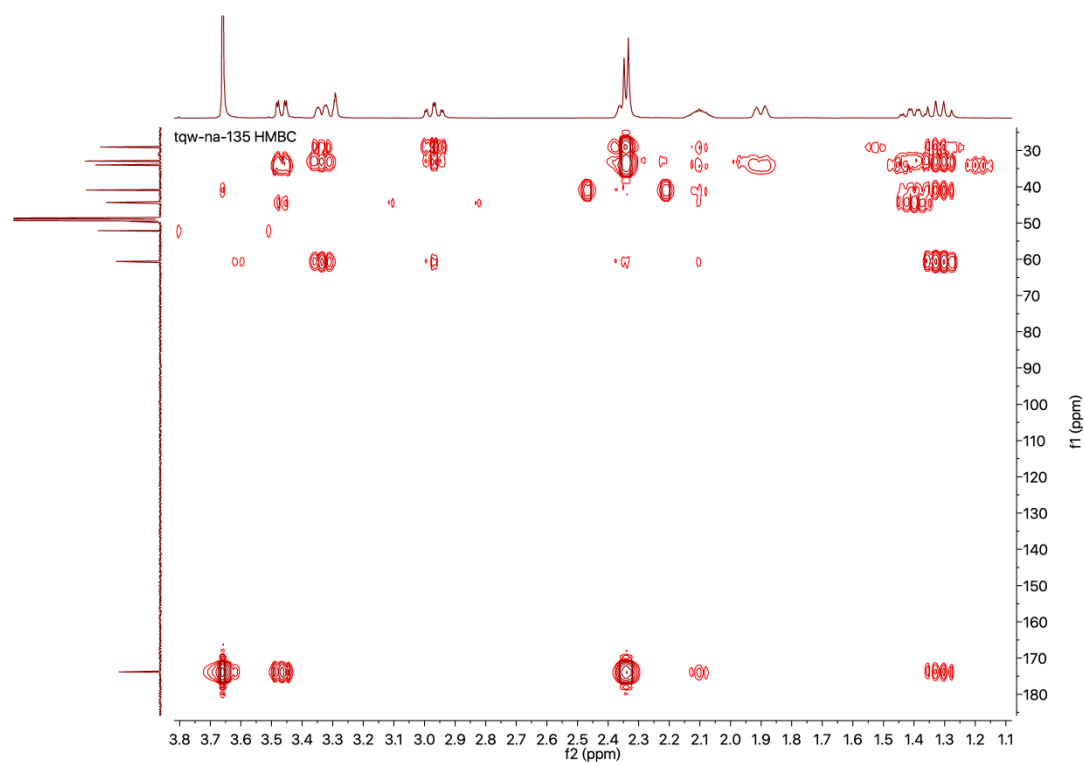

S29. HMBC of 2β-carboxyl-piperidine-4β-acetic acid methyl ester (4)

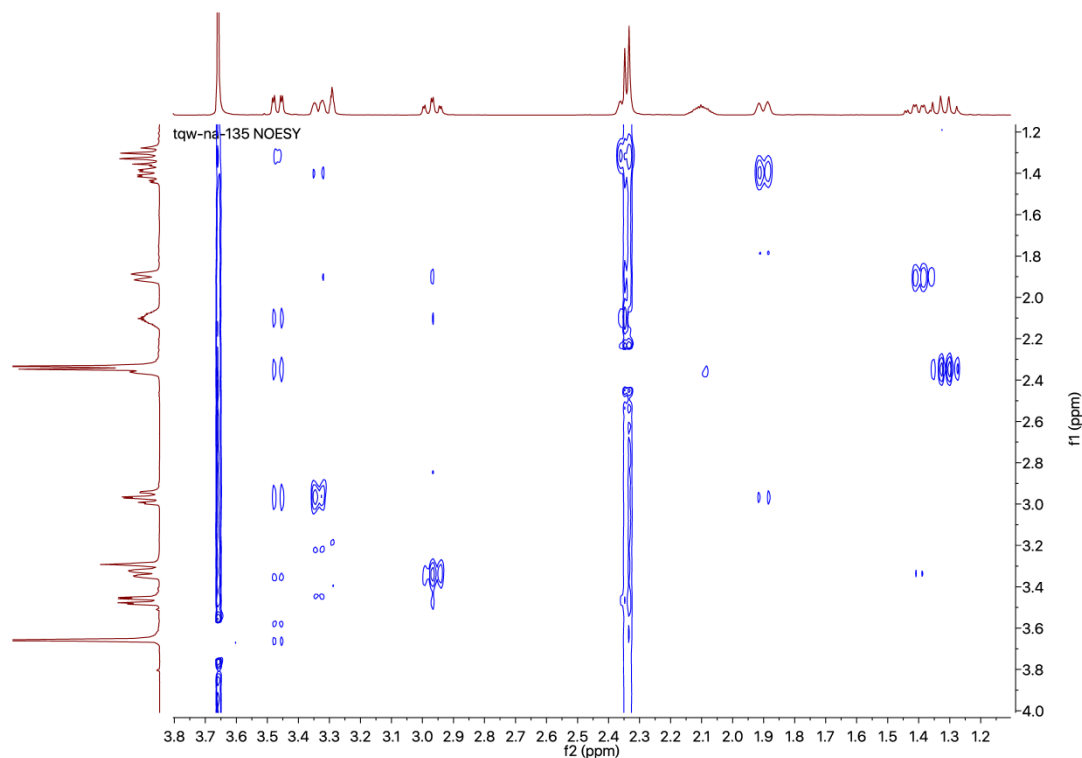

**S30. NOESY of 2 $\beta$ -carboxyl-piperidine-4 $\beta$ -acetic acid methyl ester (4)**

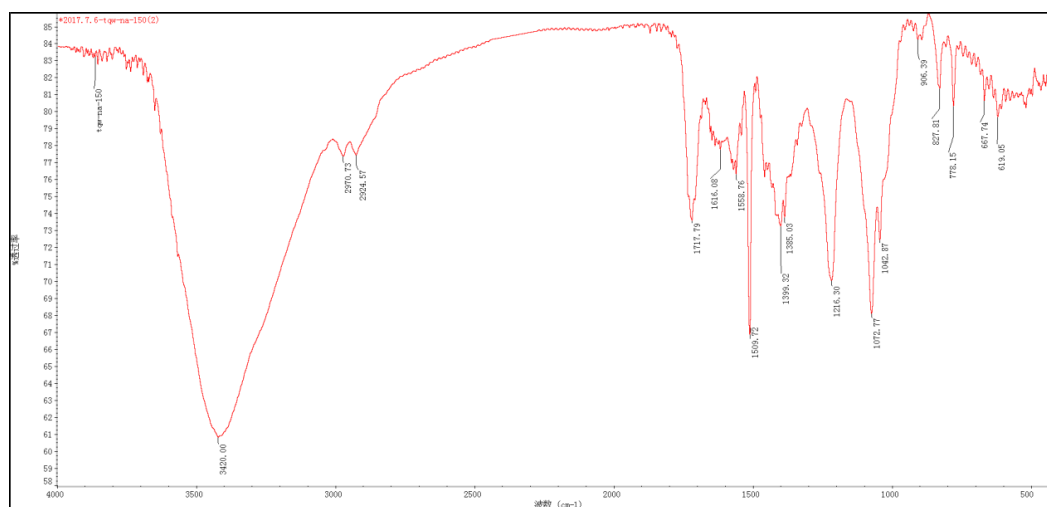

**S31. IR spectra of 4-hydroxyphenyl-1-O-[6-(hydrogen 3-hydroxy-3-methylpentanedioate)]- $\beta$ -D-glucopyranoside (5)**

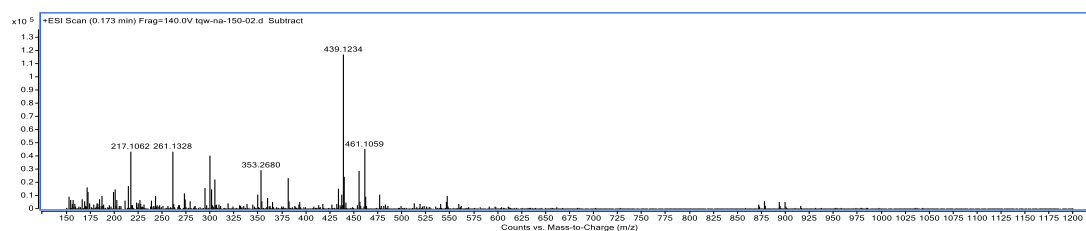

**S32. HRESIMS of 4-hydroxyphenyl-1-O-[6-(hydrogen 3-hydroxy-3-methylpentanedioate)]- $\beta$ -D-glucopyranoside (5)**



twq-na-150 1H NMR

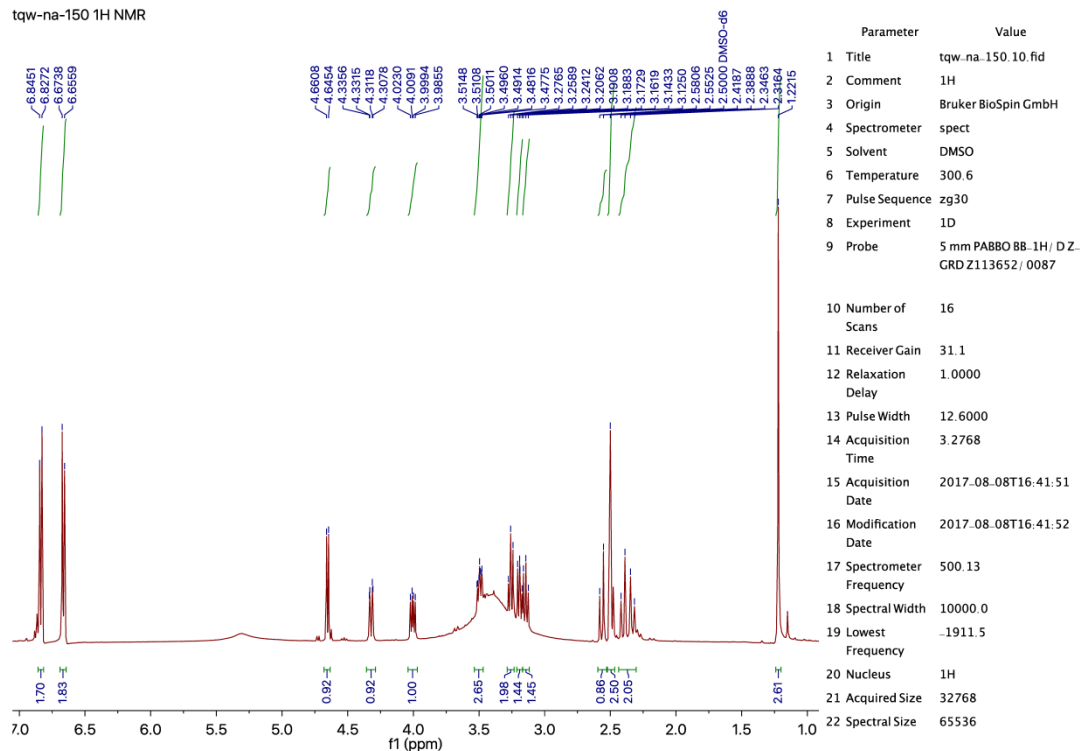

**S33. <sup>1</sup>H-NMR spectra of 4-hydroxyphenyl-1-O-[6-(hydrogen 3-hydroxy-3-methylpentanedioate)]-β-D-glucopyranoside (5) (500 MHz, DMSO-*d*<sub>6</sub>)**

twq-na-150 13C NMR

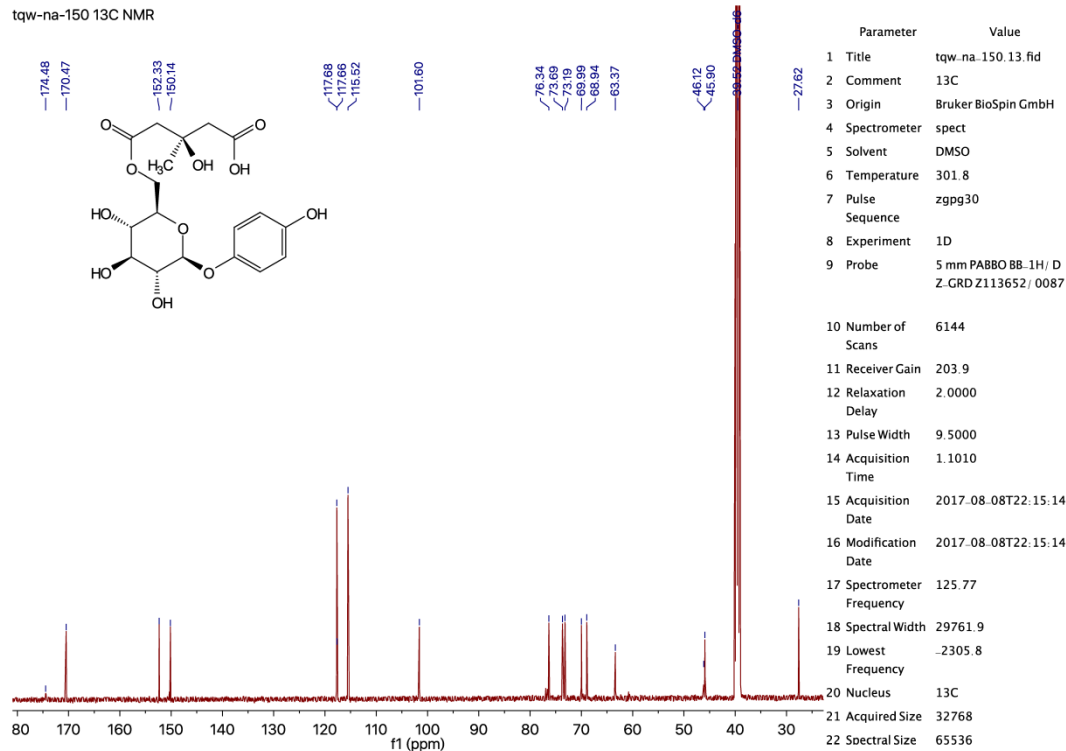

**S34. <sup>13</sup>C-NMR spectra of 4-hydroxyphenyl-1-O-[6-(hydrogen 3-hydroxy-3-methylpentanedioate)]-β-D-glucopyranoside (5) (125 MHz, DMSO-*d*<sub>6</sub>)**

tqw-150 DEPT

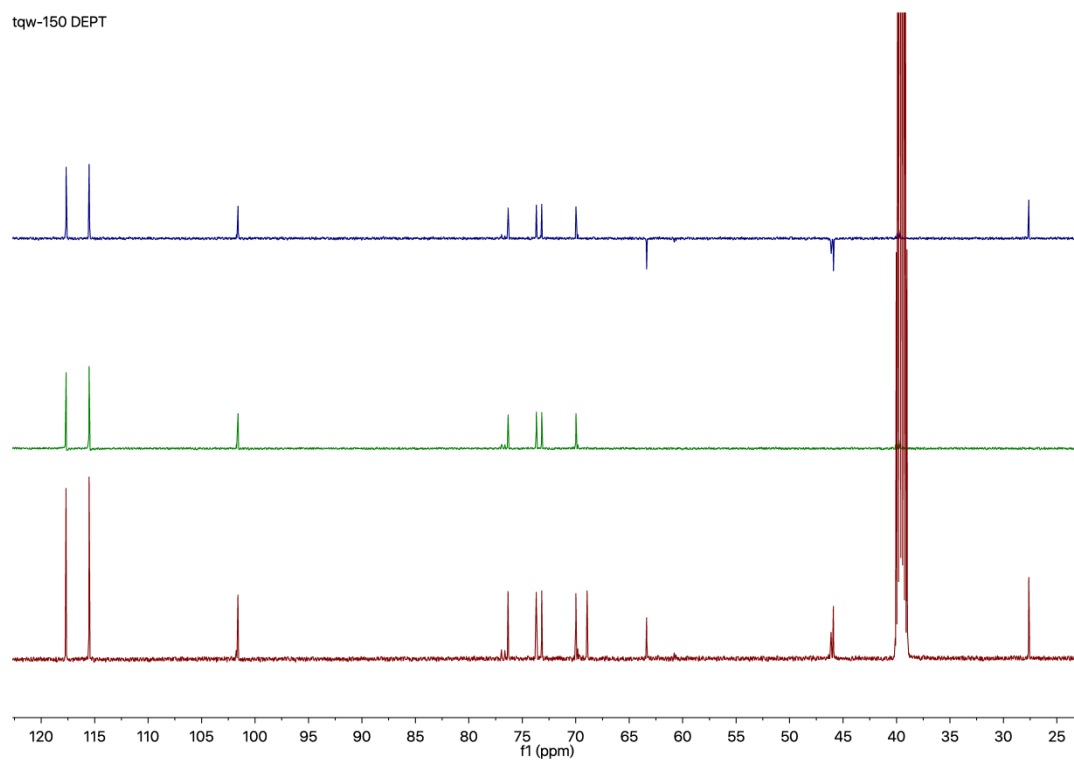

S35. DEPT of 4-hydroxyphenyl-1-*O*-[6-(hydrogen 3-hydroxy-3-methylpentanedioate)]- $\beta$ -D-glucopyranoside (5)

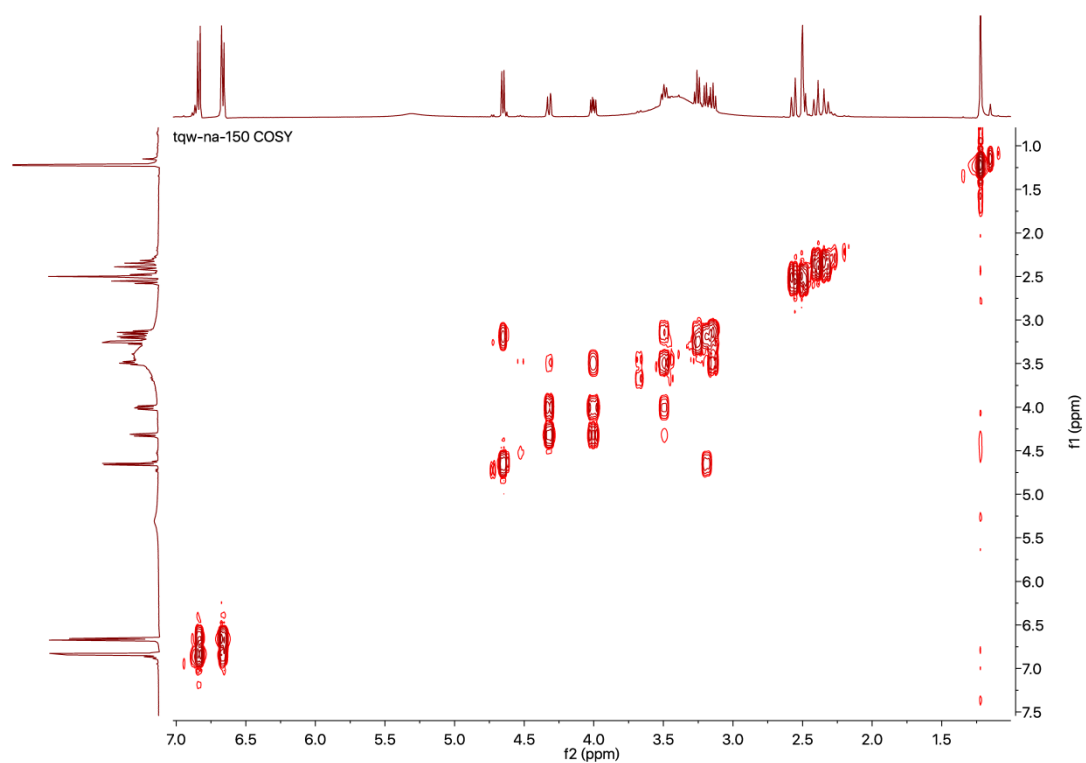

S36.  $^1\text{H}$ - $^1\text{H}$  COSY of 4-hydroxyphenyl-1-*O*-[6-(hydrogen 3-hydroxy-3-methylpentanedioate)]- $\beta$ -D-glucopyranoside (5)

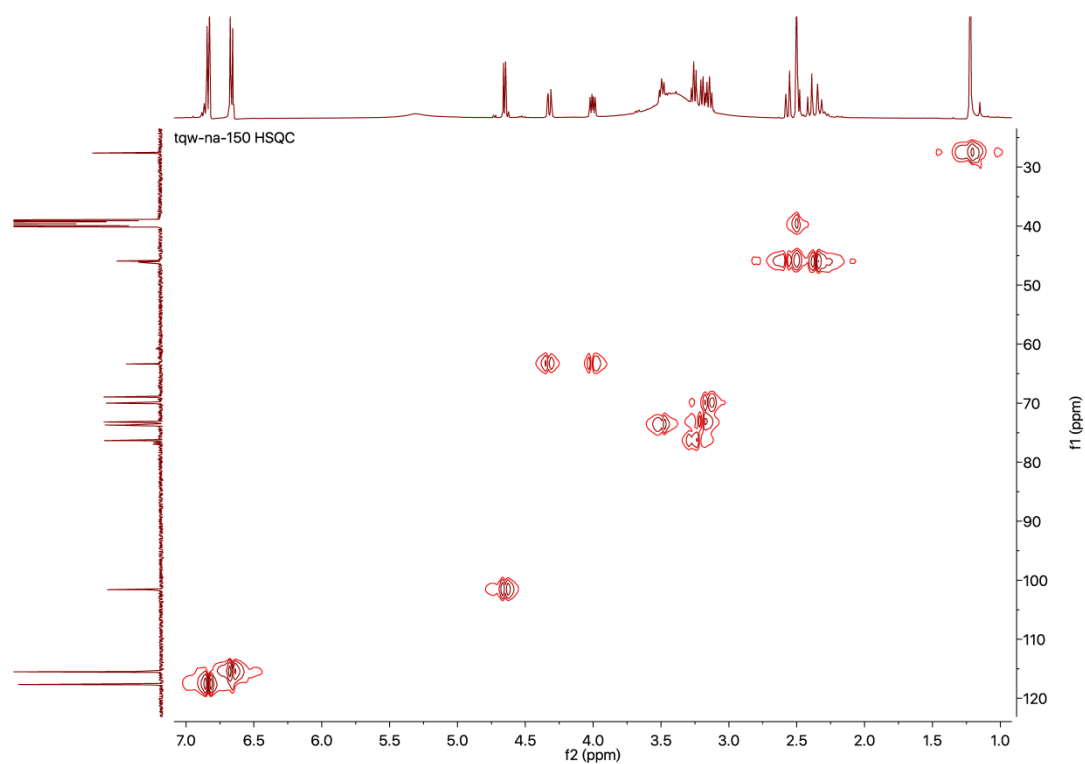

S37. HSQC of 4-hydroxyphenyl-1-*O*-[6-(hydrogen 3-hydroxy-3-methylpentanedioate)]- $\beta$ -D-glucopyranoside (5)

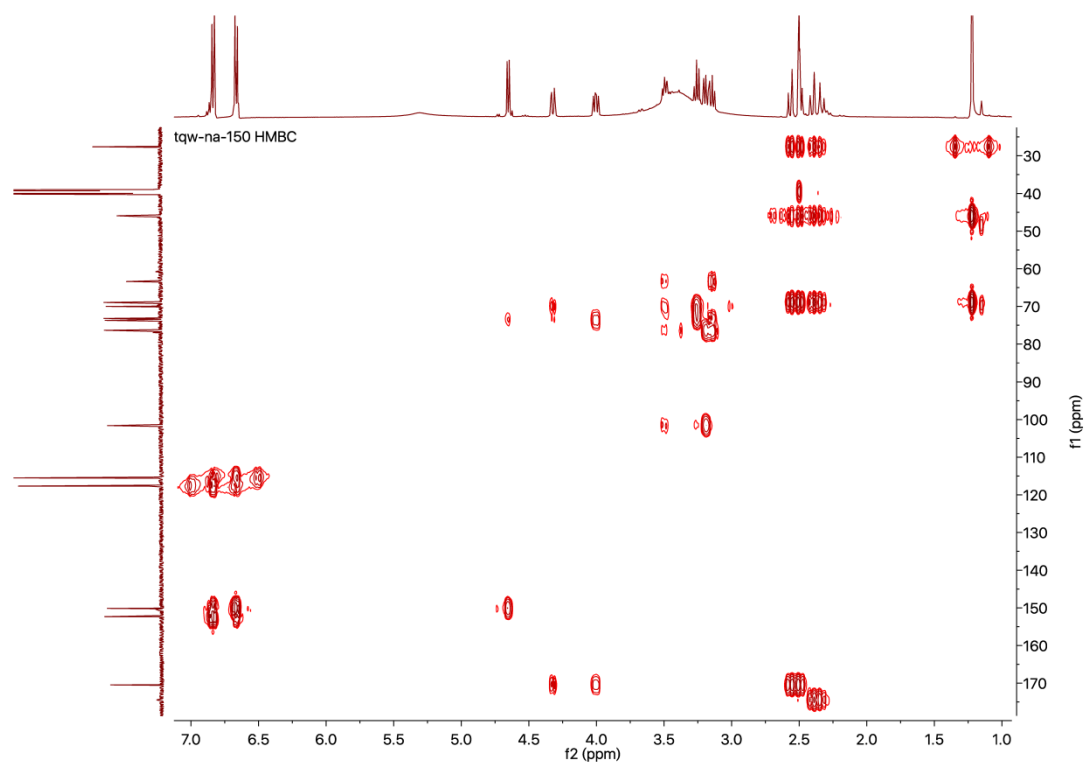

S38. HMBC of 4-hydroxyphenyl-1-*O*-[6-(hydrogen 3-hydroxy-3-methylpentanedioate)]- $\beta$ -D-glucopyranoside (5)

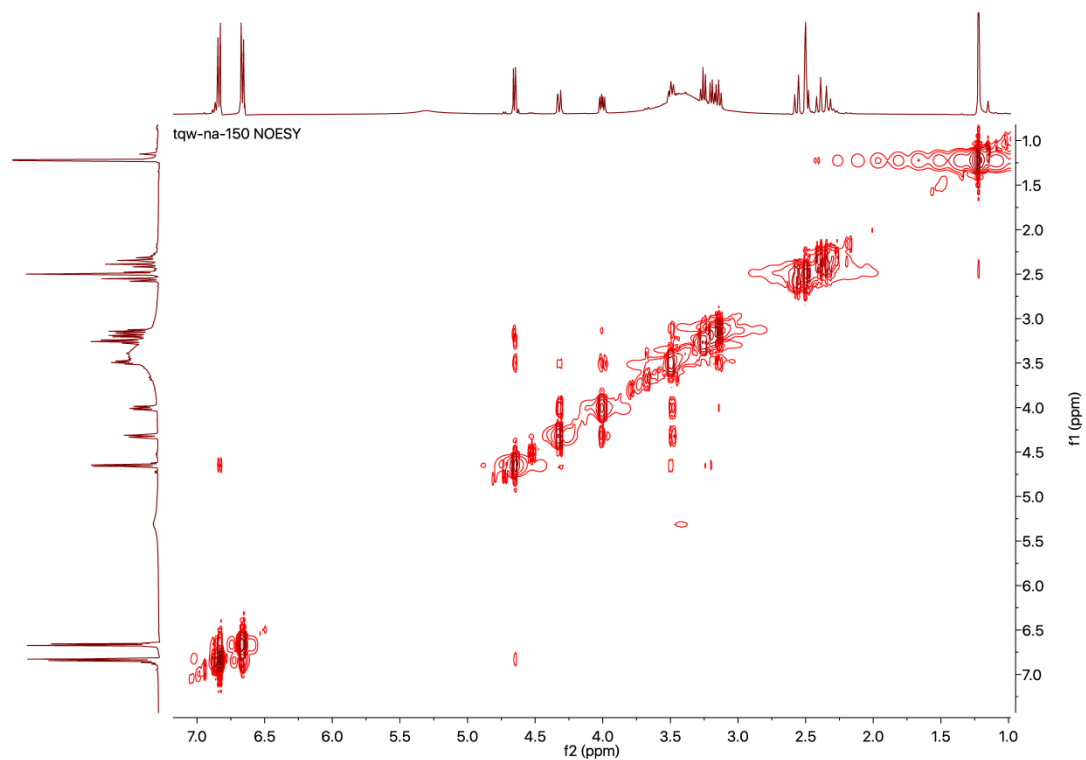

**S39. NOESY of 4-hydroxyphenyl-1-O-[6-(hydrogen 3-hydroxy-3-methylpentanedioate)]- $\beta$ -D-glucopyranoside (5)**

**S40. <sup>1</sup>H- and <sup>13</sup>C-NMR data of compounds 6–10 ( $\delta$  in ppm,  $J$  in Hz)**

| Position            | 6 <sup>a</sup> |                                              | 7 <sup>b</sup> |                                              | 8 <sup>a</sup> |                | 9 <sup>a</sup> |                                              | 10 <sup>a</sup> |               |
|---------------------|----------------|----------------------------------------------|----------------|----------------------------------------------|----------------|----------------|----------------|----------------------------------------------|-----------------|---------------|
|                     | $\delta_C$     | $\delta_H$ (J)                               | $\delta_C$     | $\delta_H$ (J)                               | $\delta_C$     | $\delta_H$ (J) | $\delta_C$     | $\delta_H$ (J)                               | $\delta_C$      | $\delta_H$    |
| 1                   | 152.4          |                                              | 150.5          |                                              | 151.3          |                | 132.8          |                                              | 126.0           |               |
| 2, 6                | 119.4          | 7.00, d (9.0)                                | 117.6          | 6.89, d (9.0)                                | 116.8          | 6.60, s        | 130.2          | 7.08, d (8.6)                                | 130.6           | 7.12, d (8.6) |
| 3, 5                | 116.6          | 6.73, d (9.0)                                | 115.6          | 6.65, d (9.0)                                | 116.8          | 6.60, s        | 116.2          | 6.75, d (8.6)                                | 115.7           | 6.76, d (8.6) |
| 4                   | 153.8          |                                              | 152.1          |                                              | 151.3          |                | 157.1          |                                              | 155.0           |               |
| 7                   |                |                                              |                |                                              |                |                | 51.2           | 2.87, p (6.7)                                | 40.4            | 3.55, s       |
| 8                   |                |                                              |                |                                              |                |                | 65.2           | 3.83, dd (10.9, 6.9)<br>3.73, dd (10.9, 6.5) | 172.9           |               |
| 9                   |                |                                              |                |                                              |                |                | 65.2           | 3.83, dd (10.9, 6.9)<br>3.73, dd (10.9, 6.5) |                 |               |
| OCH <sub>3</sub> -4 |                |                                              |                |                                              |                |                |                |                                              | 52.3            | 3.69, s       |
| Glc-1'              | 103.6          | 4.77, d (7.2)                                | 101.6          | 4.62, d (7.5)                                |                |                |                |                                              |                 |               |
| 2'                  | 75.0           | 3.38–3.50 (overlap)                          | 73.3           | 2.91–3.25 (overlap)                          |                |                |                |                                              |                 |               |
| 3'                  | 78.1           | 3.38–3.50 (overlap)                          | 76.9           | 3.40, m                                      |                |                |                |                                              |                 |               |
| 4'                  | 71.4           | 3.38–3.50 (overlap)                          | 70.2           | 2.91–3.25 (overlap)                          |                |                |                |                                              |                 |               |
| 5'                  | 78.0           | 3.38–3.50 (overlap)                          | 76.5           | 2.91–3.25 (overlap)                          |                |                |                |                                              |                 |               |
| 6'                  | 62.6           | 3.92, dd (12.1, 1.6)<br>3.73, dd (12.1, 5.3) | 68.5           | 3.97, dd (11.6, 1.6)<br>3.57, dd (11.6, 6.7) |                |                |                |                                              |                 |               |
| Glc-1''             |                |                                              | 103.3          | 4.21, d (7.8)                                |                |                |                |                                              |                 |               |
| 2''                 |                |                                              | 73.6           | 2.91–3.25 (overlap)                          |                |                |                |                                              |                 |               |
| 3''                 |                |                                              | 76.7           | 2.91–3.25 (overlap)                          |                |                |                |                                              |                 |               |
| 4''                 |                |                                              | 69.8           | 2.91–3.25 (overlap)                          |                |                |                |                                              |                 |               |
| 5''                 |                |                                              | 75.8           | 2.91–3.25 (overlap)                          |                |                |                |                                              |                 |               |
| 6''                 |                |                                              | 61.1           | 3.65, m<br>3.48, m                           |                |                |                |                                              |                 |               |

<sup>a</sup> Recorded in CD<sub>3</sub>OD at 500 MHz (<sup>1</sup>H) and 125 MHz (<sup>13</sup>C). <sup>b</sup> Recorded in DMSO-*d*<sub>6</sub> at 500 MHz (<sup>1</sup>H) and 125 MHz (<sup>13</sup>C).

**S41. <sup>1</sup>H- and <sup>13</sup>C-NMR data of compounds 11–16 ( $\delta$  in ppm,  $J$  in Hz)**

| Position            | 11 <sup>a</sup>     |                             | 12 <sup>a</sup>     |                             | 13 <sup>a</sup>     |                             | 14 <sup>a</sup>     |                             | 15 <sup>a</sup>     |                             | 16 <sup>a</sup>     |                      |
|---------------------|---------------------|-----------------------------|---------------------|-----------------------------|---------------------|-----------------------------|---------------------|-----------------------------|---------------------|-----------------------------|---------------------|----------------------|
|                     | $\delta_{\text{C}}$ | $\delta_{\text{H}}$ ( $J$ ) | $\delta_{\text{C}}$ | $\delta_{\text{H}}$  |
| 1                   | 122.7               |                             | 123.1               |                             | 123.1               |                             | 122.0               |                             | 121.4               |                             | 120.7               |                      |
| 2                   | 133.0               | 7.84, d (8.8)               | 117.7               | 7.38 <sup>a</sup>           | 115.8               | 7.52, d (1.9)               | 110.3               | 7.05, s                     | 110.0               | 7.05, s                     | 110.5               | 7.14, s              |
| 3                   | 116.0               | 6.78, d (8.8)               | 146.0               | 7.37, dd (8.1, 2.1)         | 148.6               | 7.52, dd (8.8, 1.9)         | 146.4               |                             | 146.5               |                             | 146.5               |                      |
| 4                   | 163.3               |                             | 151.5               |                             | 152.6               |                             | 139.6               |                             | 139.7               |                             | 140.3               |                      |
| 5                   | 116.0               | 6.78, d (8.8)               | 115.7               | 6.74, d (8.1)               | 113.8               | 6.80, d (8.8)               | 146.4               |                             | 146.5               |                             | 146.5               |                      |
| 6                   | 133.0               | 7.84, d (8.8)               | 123.9               |                             | 125.3               |                             | 110.3               | 7.05, s                     | 110.0               | 7.05, s                     | 110.5               | 7.14, s              |
| 7                   | 170.1               |                             | 170.3               |                             | 170.0               |                             | 170.4               |                             | 169.0               |                             | 167.0               |                      |
| Glc-1'              |                     |                             |                     |                             |                     |                             |                     |                             |                     |                             | 95.9                | 5.67, d (8.0)        |
| 2'                  |                     |                             |                     |                             |                     |                             |                     |                             |                     |                             | 74.1                | 3.37–3.52 (overlap)  |
| 3'                  |                     |                             |                     |                             |                     |                             |                     |                             |                     |                             | 78.2                | 3.37–3.52 (overlap)  |
| 4'                  |                     |                             |                     |                             |                     |                             |                     |                             |                     |                             | 71.1                | 3.37–3.52 (overlap)  |
| 5'                  |                     |                             |                     |                             |                     |                             |                     |                             |                     |                             | 78.8                | 3.37–3.52 (overlap)  |
| 6'                  |                     |                             |                     |                             |                     |                             |                     |                             |                     |                             | 62.3                | 3.86, dd (12.2, 1.9) |
|                     |                     |                             |                     |                             |                     |                             |                     |                             |                     |                             |                     | 3.71, dd (12.2, 4.6) |
| OCH <sub>3</sub> –3 |                     |                             |                     |                             | 56.4                | 3.85, s                     |                     |                             |                     |                             |                     |                      |
| OCH <sub>3</sub> –7 |                     |                             |                     |                             |                     |                             |                     |                             | 52.2                | 3.81, s                     |                     |                      |

<sup>a</sup> Recorded in CD<sub>3</sub>OD at 500 MHz (<sup>1</sup>H) and 125 MHz (<sup>13</sup>C).

S42. <sup>1</sup>H- and <sup>13</sup>C-NMR data of compounds 17 and 18 (δ in ppm, *J* in Hz)

| Position | 17 <sup>a</sup> |                             | Position    | 18 <sup>a</sup> |                             |
|----------|-----------------|-----------------------------|-------------|-----------------|-----------------------------|
|          | δ <sub>C</sub>  | δ <sub>H</sub> ( <i>J</i> ) |             | δ <sub>C</sub>  | δ <sub>H</sub> ( <i>J</i> ) |
| 1        | 119.2           | 8.47, d (9.0)               | Glucose 1   | 94.9            | 6.37, d (2.1)               |
| 2        | 112.8           | 6.79, d (9.0)               | 2           | 69.3            | 4.00, m                     |
| 3        | 141.0           |                             | 3           | 71.4            | 4.82, m                     |
| 4        | 133.3           |                             | 4           | 62.4            | 4.47, m                     |
| 4a       | 146.8           |                             | 5           | 76.0            | 4.53, m                     |
| 4b       | 112.4           |                             | 6           | 64.9            | 4.96 (overlap)              |
|          |                 |                             |             |                 | 4.16, dd (11.0, 8.0)        |
| 6        | 163.8           |                             | Galloyl G-1 | 120.5           | 7.06, s                     |
| 6a       | 112.2           |                             | G-2, 6      | 110.9           |                             |
| 7        | 108.1           | 7.41, s                     | G-3, 5      | 146.3           |                             |
| 8        | 146.4           |                             | G-4         | 140.3           |                             |
| 9        | 141.8           |                             | G-7         | 166.6           |                             |
| 10       | 144.0           |                             | Ring A-1    | 117.1           |                             |
| 10a      | 118.6           |                             | A-2         | 125.3           |                             |
|          |                 |                             | A-3         | 110.2           | 6.70, s                     |
|          |                 |                             | A-4         | 145.5           |                             |
|          |                 |                             | A-5         | 138.1           |                             |
|          |                 |                             | A-6         | 145.2           |                             |
|          |                 |                             | A-7         | 168.4           |                             |
|          |                 |                             | Ring B-1    | 116.5           |                             |
|          |                 |                             | B-2         | 125.4           |                             |
|          |                 |                             | B-3         | 108.3           | 6.67, s                     |
|          |                 |                             | B-4         | 145.9           |                             |
|          |                 |                             | B-5         | 137.5           |                             |
|          |                 |                             | B-6         | 145.1           |                             |
|          |                 |                             | B-7         | 170.0           |                             |

<sup>a</sup> Recorded in CD<sub>3</sub>OD at 500 MHz (<sup>1</sup>H) and 125 MHz (<sup>13</sup>C).

**S43. <sup>1</sup>H- and <sup>13</sup>C-NMR data of compounds 19, 20, and 27 (δ in ppm, *J* in Hz)**

| Position | 19 <sup>a</sup> |                             | 20 <sup>a</sup> |                             | 27 <sup>a</sup> |                             |
|----------|-----------------|-----------------------------|-----------------|-----------------------------|-----------------|-----------------------------|
|          | δ <sub>C</sub>  | δ <sub>H</sub> ( <i>J</i> ) | δ <sub>C</sub>  | δ <sub>H</sub> ( <i>J</i> ) | δ <sub>C</sub>  | δ <sub>H</sub> ( <i>J</i> ) |
| 2        | 158.6           |                             | 158.6           |                             | 158.5           |                             |
| 3        | 135.5           |                             | 135.5           |                             | 135.6           |                             |
| 4        | 179.5           |                             | 179.4           |                             | 179.4           |                             |
| 5        | 163.1           |                             | 163.0           |                             | 163.0           |                             |
| 6        | 100.0           | 6.25, d (2.1)               | 100.0           | 6.21, d (2.1)               | 99.9            | 6.22, d (2.1)               |
| 7        | 166.2           |                             | 166.2           |                             | 166.0           |                             |
| 8        | 94.8            | 6.45, d (2.1)               | 95.0            | 6.41, d (2.1)               | 94.9            | 6.41, d (2.1)               |
| 9        | 159.1           |                             | 159.4           |                             | 159.3           |                             |
| 10       | 105.7           |                             | 105.6           |                             | 105.6           |                             |
| 1'       | 122.8           |                             | 122.8           |                             | 123.6           |                             |
| 2'       | 132.3           | 8.10, d (8.9)               | 132.4           | 8.07, d (8.9)               | 116.1           | 7.68, d (2.2)               |
| 3'       | 116.1           | 6.94, d (8.9)               | 116.1           | 6.90, d (8.9)               | 145.8           |                             |
| 4'       | 161.6           |                             | 161.5           |                             | 149.8           |                             |
| 5'       | 116.1           | 6.94, d (8.9)               | 116.1           | 6.90, d (8.9)               | 117.7           | 6.89, d (8.4)               |
| 6'       | 132.3           | 8.10, d (8.9)               | 132.4           | 8.07, d (8.9)               | 123.1           | 7.64, dd (8.4, 2.2)         |
| Glc-1''  | 104.1           | 5.29, d (7.4)               | 104.6           | 5.13, d (7.2)               | 104.7           | 5.12, d (7.7)               |
| 2''      | 75.8            | 3.33–3.51 (overlap)         | 75.8            | 3.24–3.55 (overlap)         | 75.7            | 3.24–3.52 (overlap)         |
| 3''      | 78.1            | 3.33–3.51 (overlap)         | 78.1            | 3.24–3.55 (overlap)         | 78.2            | 3.24–3.52 (overlap)         |
| 4''      | 71.4            | 3.33–3.51 (overlap)         | 71.4            | 3.24–3.55 (overlap)         | 71.4            | 3.24–3.52 (overlap)         |
| 5''      | 78.4            | 3.25, ddd (9.7, 5.5, 2.4)   | 77.2            | 3.24–3.55 (overlap)         | 77.2            | 3.24–3.52 (overlap)         |
| 6''      | 62.7            | 3.73, dd (11.9, 2.3)        | 68.6            | 3.81, dd (10.9, 1.3)        | 68.6            | 3.82, dd (11.1, 1.6)        |
|          |                 | 3.57, dd (11.9, 5.5)        |                 | 3.24–3.55 (overlap)         |                 | 3.24–3.52 (overlap)         |
| Rha-1''' |                 |                             | 102.4           | 4.52, d (1.7)               | 102.4           | 4.53, d (1.7)               |
| 2'''     |                 |                             | 72.3            | 3.64, dd (3.5, 1.7)         | 72.1            | 3.65, dd (3.5, 1.7)         |
| 3'''     |                 |                             | 72.1            | 3.53, dd (9.5, 3.5)         | 72.2            | 3.55, dd (9.5, 3.5)         |
| 4'''     |                 |                             | 73.9            | 3.24–3.55 (overlap)         | 73.9            | 3.24–3.52 (overlap)         |
| 5'''     |                 |                             | 69.7            | 3.24–3.55 (overlap)         | 69.7            | 3.24–3.52 (overlap)         |
| 6'''     |                 |                             | 17.9            | 1.13, d (6.2)               | 17.9            | 1.13, d (6.2)               |

<sup>a</sup> Recorded in CD<sub>3</sub>OD at 500 MHz (<sup>1</sup>H) and 125 MHz (<sup>13</sup>C).



**S44. <sup>1</sup>H- and <sup>13</sup>C-NMR data of compounds 21 and 28 (δ in ppm, *J* in Hz)**

| Position     | 21 <sup>a</sup> |                             | 28 <sup>a</sup> |                             |
|--------------|-----------------|-----------------------------|-----------------|-----------------------------|
|              | δ <sub>C</sub>  | δ <sub>H</sub> ( <i>J</i> ) | δ <sub>C</sub>  | δ <sub>H</sub> ( <i>J</i> ) |
| 2            | 158.4           |                             | 158.3           |                             |
| 3            | 134.6           |                             | 134.8           |                             |
| 4            | 179.0           |                             | 179.0           |                             |
| 5            | 163.1           |                             | 163.1           |                             |
| 6            | 99.8            | 6.16, d (2.1)               | 99.7            | 6.17, d (2.1)               |
| 7            | 165.7           |                             | 165.6           |                             |
| 8            | 94.7            | 6.34, d (2.1)               | 94.7            | 6.34, d (2.1)               |
| 9            | 158.7           |                             | 158.7           |                             |
| 10           | 105.8           |                             | 105.8           |                             |
| 1'           | 122.9           |                             | 123.5           |                             |
| 2'           | 132.2           | 7.96, d (8.9)               | 116.2           | 7.56, d (2.2)               |
| 3'           | 116.2           | 6.86, d (8.9)               | 145.8           |                             |
| 4'           | 161.3           |                             | 149.6           |                             |
| 5'           | 116.2           | 6.86, d (8.9)               | 117.3           | 6.84, d (8.3)               |
| 6'           | 132.2           | 7.96, d (8.9)               | 123.2           | 7.54 dd (8.3, 2.2)          |
| Glc-1''      | 100.6           | 5.64, d (8.0)               | 100.7           | 5.63, d (8.0)               |
| 2''          | 75.9            | 5.08, dd (9.6, 8.0)         | 75.9            | 5.11, dd, (9.5, 8.0)        |
| 3''          | 77.4            | 3.64, t (9.2)               | 77.4            | 3.64 (overlap)              |
| 4''          | 71.9            | 3.23–3.51 (overlap)         | 71.8            | 3.24–3.52 (overlap)         |
| 5''          | 76.3            | 3.23–3.51 (overlap)         | 76.4            | 3.24–3.52 (overlap)         |
| 6''          | 68.3            | 3.88, br d (9.7)            | 68.3            | 3.88, br d (9.9)            |
|              |                 | 3.23–3.51 (overlap)         |                 | 3.24–3.52 (overlap)         |
| Galloyl 1''' | 121.6           |                             | 121.5           |                             |
| 2''', 6'''   | 110.6           | 7.15, s                     | 110.6           | 7.16, s                     |
| 3''', 5'''   | 146.3           |                             | 146.3           |                             |
| 4'''         | 139.8           |                             | 139.8           |                             |
| 7'''         | 167.7           |                             | 167.9           |                             |
| Rha-1''''    | 102.3           | 4.54, d (1.7)               | 102.3           | 4.56, d (1.6)               |
| 2''''        | 72.1            | 3.63, dd (3.5, 1.7)         | 72.1            | 3.64 (overlap)              |
| 3''''        | 72.3            | 3.53, dd (9.5, 3.5)         | 72.3            | 3.55, dd (9.5, 3.5)         |
| 4''''        | 73.9            | 3.23–3.51 (overlap)         | 73.9            | 3.24–3.52 (overlap)         |
| 5''''        | 69.8            | 3.23–3.51 (overlap)         | 69.8            | 3.24–3.52 (overlap)         |
| 6''''        | 17.9            | 1.12, d (6.2)               | 17.9            | 1.13, d (6.2)               |

<sup>a</sup> Recorded in CD<sub>3</sub>OD at 500 MHz (<sup>1</sup>H) and 125 MHz (<sup>13</sup>C)

**S45. <sup>1</sup>H- and <sup>13</sup>C-NMR data of compounds 22–26 ( $\delta$  in ppm,  $J$  in Hz)**

| Position   | 22 <sup>a</sup> |                     | 23 <sup>b</sup> |                            | 24 <sup>b</sup> |                     | 25 <sup>b</sup> |                           | 26 <sup>b</sup> |                     |
|------------|-----------------|---------------------|-----------------|----------------------------|-----------------|---------------------|-----------------|---------------------------|-----------------|---------------------|
|            | $\delta_C$      | $\delta_H$ (J)      | $\delta_C$      | $\delta_H$ (J)             | $\delta_C$      | $\delta_H$ (J)      | $\delta_C$      | $\delta_H$ (J)            | $\delta_C$      | $\delta_H$ (J)      |
| 2          | 146.8           |                     | 158.5           |                            | 158.5           |                     | 158.2           |                           | 158.3           |                     |
| 3          | 135.7           |                     | 135.6           |                            | 136.2           |                     | 134.9           |                           | 135.3           |                     |
| 4          | 175.9           |                     | 179.5           |                            | 179.6           |                     | 179.1           |                           | 179.3           |                     |
| 5          | 160.7           |                     | 163.1           |                            | 163.2           |                     | 163.1           |                           | 162.8           |                     |
| 6          | 98.2            | 6.18, d (2.1)       | 99.9            | 6.22, d (2.1)              | 99.8            | 6.23, d (2.1)       | 99.7            | 6.18, d (2.1)             | 99.9            | 6.17, br s          |
| 7          | 163.9           |                     | 166.0           |                            | 165.9           |                     | 165.6           |                           | 165.8           |                     |
| 8          | 93.4            | 6.40, d (2.1)       | 94.7            | 6.41, d (2.1)              | 94.7            | 6.40, d (2.1)       | 94.5            | 6.35, d (2.1)             | 94.8            | 6.33, br s          |
| 9          | 156.1           |                     | 159.0           |                            | 159.3           |                     | 158.3           |                           | 159.3           |                     |
| 10         | 103.0           |                     | 105.7           |                            | 105.9           |                     | 105.9           |                           | 105.5           |                     |
| 1'         | 122.0           |                     | 123.2           |                            | 123.0           |                     | 123.3           |                           | 123.5           |                     |
| 2'         | 115.1           | 7.68, d (2.2)       | 116.0           | 7.73, d (2.2)              | 116.4           | 7.37, d (2.1)       | 116.1           | 7.59, d (2.2)             | 115.9           | 7.54 (overlap)      |
| 3'         | 145.1           |                     | 145.9           |                            | 146.4           |                     | 145.9           |                           | 145.7           |                     |
| 4'         | 147.7           |                     | 149.8           |                            | 149.8           |                     | 149.6           |                           | 149.7           |                     |
| 5'         | 115.6           | 6.88, d (8.5)       | 117.6           | 6.89, d (8.5)              | 117.0           | 6.94, d (8.3)       | 117.1           | 6.85, d (8.4)             | 117.2           | 6.71, d (8.4)       |
| 6'         | 120.0           | 7.54, dd (8.5, 2.2) | 123.1           | 7.60, dd (8.5, 2.2)        | 122.9           | 7.33, dd (8.3, 2.1) | 123.1           | 7.55, dd (8.4, 2.2)       | 123.0           | 7.54 (overlap)      |
| 1''        |                 |                     | 104.3           | 5.27, d (7.6)              | 103.5           | 5.38, d (1.7)       | 100.5           | 5.77, d (7.9)             | 104.2           | 5.20, d (7.7)       |
| 2''        |                 |                     | 75.7            | 3.50, dd (9.2, 7.6)        | 72.0            | 4.25, dd (3.4, 1.7) | 76.0            | 5.16, dd (9.5, 7.9)       | 75.7            | 3.42–3.55 (overlap) |
| 3''        |                 |                     | 78.4            | 3.37, t (9.2)              | 72.1            | 3.78, dd (9.4, 3.4) | 76.4            | 3.69, t (9.2)             | 78.0            | 3.42–3.55 (overlap) |
| 4''        |                 |                     | 71.2            | 3.45, t (8.9)              | 73.3            | 3.38 (overlap)      | 71.6            | 3.48, t (9.4)             | 71.4            | 3.42–3.55 (overlap) |
| 5''        |                 |                     | 78.1            | 3.24, ddd, (9.7, 5.3, 2.4) | 71.9            | 3.45, dq (9.6, 6.1) | 78.7            | 3.36, ddd (9.4, 5.6, 2.3) | 75.8            | 3.42–3.55 (overlap) |
| 6''        |                 |                     | 62.6            | 3.73, dd (11.9, 2.4)       | 17.6            | 0.97, d (6.1)       | 62.5            | 3.82, dd (12.1, 2.3)      | 64.3            | 4.34, m             |
|            |                 |                     |                 | 3.59, dd (11.9, 5.3)       |                 |                     |                 | 3.64, dd (12.1, 5.6)      |                 | 4.27, br d (11.6)   |
| 1'''       |                 |                     |                 |                            |                 |                     | 121.5           |                           | 121.2           |                     |
| 2''', 6''' |                 |                     |                 |                            |                 |                     | 110.6           | 7.15, s                   | 110.2           | 6.94, s             |
| 3''', 5''' |                 |                     |                 |                            |                 |                     | 146.3           |                           | 146.6           |                     |
| 4'''       |                 |                     |                 |                            |                 |                     | 139.8           |                           | 139.7           |                     |
| 7'''       |                 |                     |                 |                            |                 |                     | 167.8           |                           | 168.2           |                     |

<sup>a</sup> Recorded in DMSO-*d*<sub>6</sub> at 500 MHz (<sup>1</sup>H) and 125 MHz (<sup>13</sup>C). <sup>b</sup> Recorded in CD<sub>3</sub>OD at 500 MHz (<sup>1</sup>H) and 125 MHz (<sup>13</sup>C).
